# Supplementary material for: Diastereoselective formation of aziridines from diazocarbonyl compounds and N-(O-pivaloylated d-galactosyl)benzylideneamines and ring-opening reactions with p-toluenethiol
Source: Royal Society of Chemistry journal article supplement (doi:10.1039/c4ob00443d), 2014-01-01
Supplement: c4ob00443d1.pdf [file c4ob00443d1.pdf]

Electronic Supplementary Material (ESI) for Organic .  
This journal is © The Royal Society of Chemistry 2014

**Supplementary Information**  
**For**  
**Diastereoselective formation of aziridines from**  
**diazocarbonyl compounds and**  
**N-(O-pivaloylated D-galactosyl)**  
**benzylideneamines and ring-opening reactions**  
**with p-toluenethiol**

Yizhou Zhao<sup>a†</sup>, Gang Wang<sup>a†</sup>, Shanshan Zhou<sup>a</sup>, Zhongjun Li<sup>a\*</sup> and  
Xiangbao Meng<sup>a\*</sup>

<sup>a</sup> State Key Laboratory of Natural and Biomimetic Drugs, Department of Chemical Biology,  
School of Pharmaceutical Sciences, Peking University, Beijing 100191, People's Republic  
of China

Fax: (+86)-10-8280-5496; E-mail: xbmeng@bjmu.edu.cn or zjli@bjmu.edu.cn

† These authors contributed equally to this research.

## List of contents

|                                                               |     |
|---------------------------------------------------------------|-----|
| 1. General Remarks-----                                       | S2  |
| 2. General procedure for the preparation of <b>3</b> -----    | S3  |
| 3. General procedure for the preparation of <b>4</b> -----    | S7  |
| 4. Copies of NMR spectra of <b>3</b> and <b>4</b> -----       | S9  |
| 5. Copies of HR-ESI-MS spectra of <b>3</b> and <b>4</b> ----- | S20 |
| 6. Copies of chiral HPLC data of <b>3</b> and <b>4</b> -----  | S26 |

### General Remarks

Unless otherwise noted, all reagents were obtained from commercial suppliers and used without further purification. Reactions were monitored by thin-layer chromatography (TLC) using commercial silica gel HSGF254 plates. Column chromatography was performed on Silica Gel 60 (E. Merck, 230-400 mesh). The  $^1\text{H}$  (400 MHz) and  $^{13}\text{C}$  NMR (100.6 MHz) spectra were recorded with Bruker AM-400 spectrometer in  $\text{CDCl}_3$  solution. Chemical shifts were referenced with tetramethylsilane (0 ppm for  $^1\text{H}$  and 77.0 ppm for  $^{13}\text{C}$ ). The HR-ESI-MS data were measured on a Bruker Apex IV FTMS. The chiral HPLC data of **3** were measured by Daicel Chiralcel OD-H, and the data of **4** were measured by Daicel Chiralpak IB.

## General procedure for the preparation of 3

An oven-dried 10 mL vial was charged with **1** (0.30 mmol), then 3 mL of dry  $\text{CH}_2\text{Cl}_2$  and  $\text{BF}_3 \cdot \text{OEt}_2$  (0.15 mmol) were added. The mixture solution was stirred at  $-40^\circ\text{C}$  for 15 min before the addition of **2** (0.45 mmol) via a syringe. The resulting solution was continued stirring until the reaction was complete as shown by TLC (usually 2 hours). Then three drops of triethylamine were added and the mixture was gradually warmed to room temperature. The mixture was purified by column chromatography on silica gel (petroleum ether/ethyl acetate=15/1), yielding the corresponding compounds **3** as white or pale yellow solid.

### *cis*-1-(2,3,4,6-tetra-O-pivaloyl- $\beta$ -D-galactosyl)-(3*S*)-(4-nitrophenyl)-aziridine-(2*R*)-ethyl formate (**3a**)

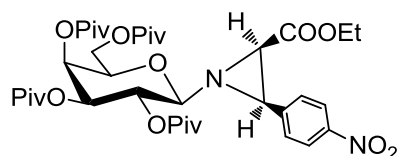

$^1\text{H NMR}$  (400 MHz,  $\text{CDCl}_3$ )  $\delta$  8.14 (d,  $J = 8.2$  Hz, 2H, *H*-Ar), 7.56 (d,  $J = 8.0$  Hz, 2H, *H*-Ar), 5.43 (d,  $J = 3.0$  Hz, 1H, *H*-4), 5.33 (t,  $J = 9.6$  Hz, 1H, *H*-2), 5.20 (dd,  $J = 10.5$ , 3.0 Hz, 1H, *H*-3), 4.54 (d,  $J = 8.8$  Hz, 1H, *H*-1), 4.24 – 4.09 (m, 1H, *H*-5), 4.08 – 3.81 (m, 4H, *H*-6,  $-\text{CH}_2\text{CH}_3$ ), 3.73 (d,  $J = 6.5$  Hz, 1H,  $-\text{CHCOO}-$ ), 3.27 (d,  $J = 6.5$  Hz, 1H,  $-\text{CH-Ar}$ ), 1.29 (s, 9H, *H*-Piv), 1.24 (s, 9H, *H*-Piv), 1.19 (s, 9H, *H*-Piv), 1.13 (s, 9H, *H*-Piv), 1.02 (t,  $J = 7.0$  Hz, 3H,  $-\text{CH}_3$ ).  $^{13}\text{C NMR}$  (101 MHz,  $\text{CDCl}_3$ )  $\delta$  177.78, 177.27, 176.66, 176.52, 166.67, 147.38, 141.99, 128.96, 122.95, 86.49, 72.45, 71.12, 67.72, 66.84, 61.04, 60.86, 40.47, 39.11, 38.73, 38.29, 27.21, 27.05, 13.96. **HR-ESI-MS**: Calcd for  $\text{C}_{37}\text{H}_{55}\text{N}_2\text{O}_{13}$   $[\text{M}+\text{H}]^+$ : 735.3699, found: 735.3700.

### *cis*-1-(2,3,4,6-tetra-O-pivaloyl- $\beta$ -D-galactosyl)-(3*S*)-(4-chlorophenyl)-aziridine-(2*R*)-ethyl formate (**3b**)

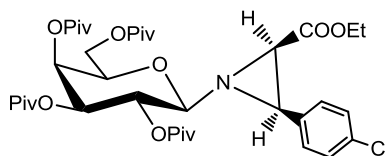

$^1\text{H NMR}$  (400 MHz,  $\text{CDCl}_3$ )  $\delta$  7.33 (d,  $J = 6.8$  Hz, 2H, *H*-Ar), 7.26 (d,  $J = 8.5$  Hz, 2H, *H*-Ar), 5.44 (d,  $J = 3.1$  Hz, 1H, *H*-4), 5.33 (dd,  $J = 10.4$ , 8.9 Hz, 1H, *H*-2), 5.20 (dd,  $J = 10.4$ , 3.2 Hz, 1H, *H*-3), 4.48 (d,  $J = 8.8$  Hz, 1H, *H*-1), 4.23 – 4.08 (m, 1H, *H*-5), 4.08 – 3.81 (m, 4H, *H*-6,  $-\text{CH}_2\text{CH}_3$ ), 3.66 (d,  $J = 6.7$  Hz, 1H,  $-\text{CHCOO}-$ ), 3.19 (d,  $J = 6.7$  Hz, 1H,  $-\text{CH-Ar}$ ), 1.29 (s, 9H, *H*-Piv), 1.23 (s, 9H, *H*-Piv), 1.19 (s, 9H, *H*-Piv), 1.13 (s, 9H, *H*-Piv), 1.02 (t,  $J = 7.0$  Hz, 3H,  $-\text{CH}_3$ ).  $^{13}\text{C NMR}$  (101 MHz,  $\text{CDCl}_3$ )  $\delta$  177.83, 177.33, 176.76, 176.51, 167.13, 133.37, 133.00, 129.38, 127.92, 86.84, 72.36, 71.27, 67.83, 66.93, 61.15, 60.64, 40.62, 39.13, 38.78, 38.75, 38.73, 38.18, 27.24, 27.08, 13.98. **HR-ESI-MS**: Calcd for  $\text{C}_{37}\text{H}_{55}\text{ClNO}_{11}$   $[\text{M}+\text{H}]^+$ : 724.3458, found:

724.3447.

***cis*-1-(2,3,4,6-tetra-*O*-pivaloyl- $\beta$ -D-galactosyl)-(3*S*)-(4-fluorophenyl)-aziridine-(2*R*)-ethyl formate (3c)**

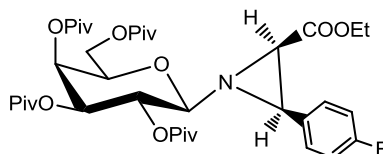

$^1\text{H NMR}$  (400 MHz,  $\text{CDCl}_3$ )  $\delta$  7.37 (t, 2H, *H*-Ar), 6.97 (t,  $J = 8.6$  Hz, 2H, *H*-Ar), 5.43 (d,  $J = 3.0$  Hz, 1H, *H*-4), 5.33 (t,  $J = 9.6$  Hz, 1H, *H*-2), 5.20 (dd,  $J = 10.4, 2.8$  Hz, 1H, *H*-3), 4.47 (d,  $J = 8.8$  Hz, 1H, *H*-1), 4.16 (m, 1H, *H*-5), 4.07 – 3.80 (m, 4H, *H*-6,  $-\text{CH}_2\text{CH}_3$ ), 3.65 (d,  $J = 6.6$  Hz, 1H,  $-\text{CHCOO}-$ ), 3.17 (d,  $J = 6.6$  Hz, 1H,  $-\text{CH-Ar}$ ), 1.31 (s, 9H, *H*-Piv), 1.23 (s, 9H, *H*-Piv), 1.20 (s, 9H, *H*-Piv), 1.14 (s, 9H, *H*-Piv), 1.01 (t,  $J = 7.1$  Hz, 3H,  $-\text{CH}_3$ ).  $^{13}\text{C NMR}$  (101 MHz,  $\text{CDCl}_3$ )  $\delta$  177.79, 177.31, 176.74, 176.46, 167.19, 130.13, 129.62, 129.54, 114.72, 114.51, 86.97, 72.37, 71.32, 67.86, 66.95, 61.17, 60.53, 40.61, 39.12, 38.76, 38.73, 38.71, 38.18, 27.22, 27.07, 13.94. **HR-ESI-MS:** Calcd for  $\text{C}_{37}\text{H}_{55}\text{FNO}_{11}$   $[\text{M}+\text{H}]^+$ : 708.3753, found: 708.3762.

***cis*-1-(2,3,4,6-tetra-*O*-pivaloyl- $\beta$ -D-galactosyl)-(3*S*)-(4-bromophenyl)-aziridine-(2*R*)-ethyl formate (3d)**

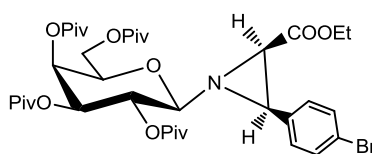

$^1\text{H NMR}$  (400 MHz,  $\text{CDCl}_3$ )  $\delta$  7.39 (d, 2H, *H*-Ar), 7.26 (d, 2H, *H*-Ar), 5.42 (d,  $J = 3.1$  Hz, 1H, *H*-4), 5.31 (dd,  $J = 10.4, 8.8$  Hz, 1H, *H*-2), 5.18 (dd,  $J = 10.4, 3.2$  Hz, 1H, *H*-3), 4.47 (d,  $J = 8.8$  Hz, 1H, *H*-1), 4.21 – 4.07 (m, 1H, *H*-5), 4.07 – 3.78 (m, 4H, *H*-6,  $-\text{CH}_2\text{CH}_3$ ), 3.61 (d,  $J = 6.7$  Hz, 1H,  $-\text{CHCOO}-$ ), 3.18 (d,  $J = 6.7$  Hz, 1H,  $-\text{CH-Ar}$ ), 1.29 (s, 9H, *H*-Piv), 1.22 (s, 9H, *H*-Piv), 1.19 (s, 9H, *H*-Piv), 1.12 (s, 9H, *H*-Piv), 1.01 (t,  $J = 7.1$  Hz, 3H,  $-\text{CH}_3$ ).  $^{13}\text{C NMR}$  (101 MHz,  $\text{CDCl}_3$ )  $\delta$  177.79, 177.30, 176.73, 176.48, 167.07, 133.55, 130.85, 129.72, 121.53, 86.83, 72.40, 71.29, 67.83, 66.94, 61.15, 60.62, 40.66, 39.12, 38.77, 38.73, 38.72, 38.12, 27.23, 27.07, 13.96. **HR-ESI-MS:** Calcd for  $\text{C}_{37}\text{H}_{55}\text{BrNO}_{11}$   $[\text{M}+\text{H}]^+$ : 768.2953, found: 768.2967.

***cis*-1-(2,3,4,6-tetra-*O*-pivaloyl- $\beta$ -D-galactosyl)-(3*S*)-(4-cyanophenyl)-aziridine-(2*R*)-ethyl formate (3e)**

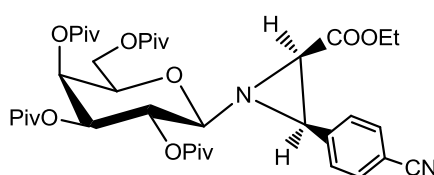

**<sup>1</sup>H NMR** (400 MHz, CDCl<sub>3</sub>) δ 7.56 (d, 2H, *H*-Ar), 7.51 (d, 2H, *H*-Ar), 5.43 (d, *J* = 3.1 Hz, 1H, *H*-4), 5.32 (dd, *J* = 10.4, 8.9 Hz, 1H, *H*-2), 5.19 (dd, *J* = 10.4, 3.1 Hz, 1H, *H*-3), 4.50 (d, *J* = 8.8 Hz, 1H, *H*-1), 4.17 (m, 1H, *H*-5), 4.07 – 3.80 (m, 4H, *H*-6, -CH<sub>2</sub>CH<sub>3</sub>), 3.70 (d, *J* = 6.7 Hz, 1H, -CHCOO-), 3.24 (d, *J* = 6.7 Hz, 1H, -CH-Ar), 1.30 (s, 9H, *H*-Piv), 1.24 (s, 9H, *H*-Piv), 1.18 (s, 9H, *H*-Piv), 1.12 (s, 9H, *H*-Piv), 1.00 (t, *J* = 7.1 Hz, 3H, -CH<sub>3</sub>). **<sup>13</sup>C NMR** (101 MHz, CDCl<sub>3</sub>) δ 177.78, 177.28, 176.67, 176.50, 166.73, 140.01, 131.53, 128.86, 118.77, 111.37, 86.62, 72.47, 71.17, 67.77, 66.88, 61.08, 60.80, 40.69, 39.12, 38.77, 38.73, 38.31, 27.22, 27.06, 13.94. **HR-ESI-MS**: Calcd for C<sub>38</sub>H<sub>55</sub>N<sub>2</sub>O<sub>11</sub> [M+H]<sup>+</sup>: 715.3800, found: 715.3806.

***cis*-1-(2,3,4,6-tetra-*O*-pivaloyl-β-*D*-galactosyl)-(3*S*)-(4-trifluoromethylphenyl)-aziridine-(2*R*)-ethyl formate (3f)**

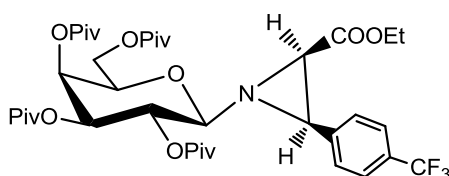

**<sup>1</sup>H NMR** (400 MHz, CDCl<sub>3</sub>) δ 7.54 (d, *J* = 8.7 Hz, 2H, *H*-Ar), 7.50 (d, *J* = 8.7 Hz, 2H, *H*-Ar), 5.43 (d, *J* = 3.1 Hz, 1H, *H*-4), 5.32 (dd, *J* = 10.4, 8.9 Hz, 1H, *H*-2), 5.20 (dd, *J* = 10.4, 3.2 Hz, 1H, *H*-3), 4.51 (d, *J* = 8.8 Hz, 1H, *H*-1), 4.22 – 4.08 (m, 1H, *H*-5), 4.07 – 3.79 (m, 4H, *H*-6, -CH<sub>2</sub>CH<sub>3</sub>), 3.71 (d, *J* = 6.7 Hz, 1H, -CHCOO-), 3.23 (d, *J* = 6.7 Hz, 1H, -CH-Ar), 1.30 (s, 9H, *H*-Piv), 1.23 (s, 9H, *H*-Piv), 1.19 (s, 9H, *H*-Piv), 1.12 (s, 9H, *H*-Piv), 0.98 (t, *J* = 7.1 Hz, 3H, -CH<sub>3</sub>). **<sup>13</sup>C NMR** (101 MHz, CDCl<sub>3</sub>) δ 177.80, 177.30, 176.71, 176.51, 166.94, 138.55, 128.38, 124.67, 124.63, 86.67, 72.38, 71.19, 67.78, 66.89, 61.11, 60.68, 40.64, 39.11, 38.76, 38.72, 38.18, 27.21, 27.05, 13.85. **HR-ESI-MS**: Calcd for C<sub>38</sub>H<sub>55</sub>F<sub>3</sub>NO<sub>11</sub> [M+H]<sup>+</sup>: 758.3721, found: 758.3722.

***cis*-1-(2,3,4,6-tetra-*O*-pivaloyl-β-*D*-galactosyl)-(3*S*)-(3,4-dichlorophenyl)-aziridine-(2*R*)-ethyl formate (3j)**

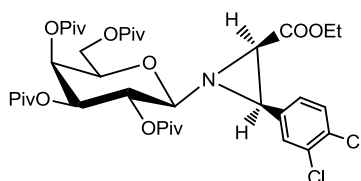

**<sup>1</sup>H NMR** (400 MHz, CDCl<sub>3</sub>) δ 7.52 (d, 1H, *H*-Ar), 7.34 (d, 1H, *H*-Ar), 7.20 (dd, *J* = 8.3, 1.9 Hz, 1H, *H*-Ar), 5.40 (d, *J* = 3.1 Hz, 1H, *H*-4), 5.34 – 5.24 (m, 1H, *H*-2), 5.23 – 5.14 (m, 1H, *H*-3), 4.49 (d, *J* = 8.9 Hz, 1H, *H*-1), 4.13 (m, 1H, *H*-5), 4.08 – 3.84 (m, 4H, *H*-6, -CH<sub>2</sub>CH<sub>3</sub>), 3.60 (d, *J* = 6.6 Hz, 1H, -CHCOO-), 3.20 (d, *J* = 6.7 Hz, 1H, -CH-Ar), 1.29 (s, 9H, *H*-Piv), 1.25 (s, 9H, *H*-Piv), 1.19 (s, 9H, *H*-Piv), 1.13 (s, 9H, *H*-Piv), 1.05 (t, *J* = 7.1 Hz, 3H, -CH<sub>3</sub>). **<sup>13</sup>C NMR** (101 MHz, CDCl<sub>3</sub>) δ 177.79, 177.28, 176.70, 176.50, 166.98, 134.81, 131.87, 131.52, 130.21, 129.73, 127.34, 86.47, 72.38, 71.19, 67.75, 66.85, 61.06, 60.77, 39.95, 39.11, 38.76, 38.74, 38.73, 38.13, 27.22,

27.06, 13.96. **HR-ESI-MS:** Calcd for C<sub>37</sub>H<sub>54</sub>Cl<sub>2</sub>NO<sub>11</sub> [M+H]<sup>+</sup>: 758.3068, found: 758.3081.

**cis-1-(2,3,4,6-tetra-O-pivaloyl-β-D-galactosyl)-(2R)-benzoyl-(3S)-(4-nitrophenyl)-aziridine (3k)**

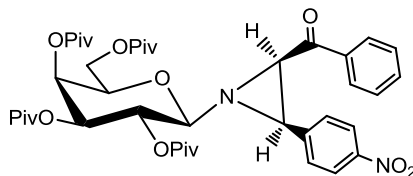

<sup>1</sup>H NMR (400 MHz, CDCl<sub>3</sub>) δ 8.20 (d, *J* = 8.7 Hz, 2H, *H*-p-NO<sub>2</sub>-Ph), 8.03 (d, 2H, *H*-p-NO<sub>2</sub>-Ph), 7.62 (t, *J* = 7.4 Hz, 1H, *H*-Ph), 7.58 – 7.46 (m, 4H, *H*-Ph), 5.64 (dd, *J* = 2.7, 3.1 Hz, 1H, *H*-4), 5.36 (d, *J* = 10.4, 8.9 Hz, 1H, *H*-2), 5.21 – 5.06 (m, 1H, *H*-3), 4.31 (d, *J* = 8.9 Hz, 1H, *H*-1), 3.91 (d, *J* = 2.7 Hz, 1H, *H*-5), 3.86 – 3.68 (m, 2H, *H*-6), 3.57 (d, *J* = 2.8 Hz, 1H, -CHCO-), 3.39 (dd, *J* = 10.5, 5.4 Hz, 1H, -CH-Ar), 1.28 (s, 9H, *H*-Piv), 1.10 (s, 9H, *H*-Piv), 0.99 (s, 9H, *H*-Piv), 0.81 (s, 9H, *H*-Piv). <sup>13</sup>C NMR (101 MHz, CDCl<sub>3</sub>) δ 193.32, 177.57, 177.33, 176.74, 176.22, 147.55, 144.38, 137.38, 133.90, 128.81, 128.58, 127.49, 123.76, 88.37, 72.52, 71.54, 70.11, 66.63, 60.15, 47.19, 45.53, 39.04, 38.76, 38.56, 38.47, 27.18, 27.11, 26.87, 26.83. **HR-ESI-MS:** Calcd for C<sub>41</sub>H<sub>55</sub>N<sub>2</sub>O<sub>12</sub> [M+H]<sup>+</sup>: 767.3749, found: 767.3750.

## General procedure for the preparation of 4

An oven-dried 10 mL vial was charged with **3** (0.15 mmol) and 4-methylbenzenethiol (0.30 mmol). After the solid was dissolved by 2.5 mL of dry CH<sub>2</sub>Cl<sub>2</sub>, BF<sub>3</sub>·OEt<sub>2</sub> (0.20 mmol) was added. Then the solution was stirred at room temperature for 7 days. When the reaction was complete as shown by TLC, triethylamine (0.20 mmol) was added to adjust the PH, decreasing the salt form of amino acids. The mixture was purified by column chromatography on silica gel (petroleum ether/ethyl acetate = 6/1), yielding the corresponding β-S-substituted phenylalanine derivatives **4** as yellow viscous oil.

### ethyl-(2S,3S)-2-amino-3-(4-methoxyphenylthiol)-3-(4-nitrophenyl)-propanoate (4a)

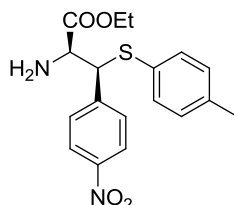

<sup>1</sup>H NMR (400 MHz, CD<sub>3</sub>OD) δ 8.12 (d, *J* = 8.6 Hz, 2H, *H*-p-NO<sub>2</sub>-Ph), 7.54 (d, *J* = 8.6 Hz, 2H, *H*-p-NO<sub>2</sub>-Ph), 7.19 (d, *J* = 7.8 Hz, 2H, *H*-p-CH<sub>3</sub>-Ph), 7.06 (d, *J* = 7.8 Hz, 2H, *H*-p-CH<sub>3</sub>-Ph), 4.60 (d, *J* = 7.2 Hz, 1H, -CH-NH<sub>2</sub>), 4.03-3.95 (m, 2H, -CH<sub>2</sub>CH<sub>3</sub>), 3.91 (d, *J* = 7.2 Hz, 1H, -CH-S-), 2.27 (s, 3H, -CH<sub>3</sub>), 1.06 (t, *J* = 7.0 Hz, 3H, -CH<sub>2</sub>CH<sub>3</sub>). <sup>13</sup>C NMR (101 MHz, CDCl<sub>3</sub>) δ 173.46(CO), 148.67(Ar), 148.58(Ar), 139.71(Ar), 134.66(Ar), 130.96(Ar), 130.90(Ar), 130.62(Ar), 124.26(Ar), 62.39(-CH-NH<sub>2</sub>), 60.01 (2, -CH<sub>2</sub>CH<sub>3</sub>, -CH-S-), 21.11(-CH<sub>3</sub>), 14.25(-CH<sub>2</sub>CH<sub>3</sub>). **HR-ESI-MS**: Calcd for C<sub>18</sub>H<sub>20</sub>N<sub>2</sub>O<sub>4</sub>S [M+H]<sup>+</sup>: 361.1216, found: 361.1210. [α]<sub>D</sub><sup>20</sup> = 120° (c 0.5g/100mL in CH<sub>3</sub>OH).

### ethyl-(2S,3S)-2-amino-3-(4-methoxyphenylthiol)-3-(4-chlorophenyl)-propanoate (4b)

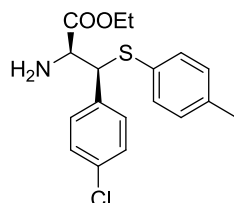

<sup>1</sup>H NMR (400 MHz, CDCl<sub>3</sub>) δ 7.28 (d, *J* = 8.0 Hz, 2H, *H*-p-Cl-Ph), 7.24 (d, *J* = 8.0 Hz, 2H, *H*-p-Cl-Ph), 7.15 (d, *J* = 8.0 Hz, 2H, *H*-p-CH<sub>3</sub>-Ph), 7.01 (d, *J* = 8.0 Hz, 2H, *H*-p-CH<sub>3</sub>-Ph), 4.43 (d, *J* = 6.0 Hz, 1H, -CH-NH<sub>2</sub>), 4.06-3.92 (m, 2H, -CH<sub>2</sub>CH<sub>3</sub>), 3.80 (d, *J* = 6.0 Hz, 1H, -CH-S-), 2.28 (s, 3H, -CH<sub>3</sub>), 1.08 (t, *J* = 6.8 Hz, 3H, -CH<sub>2</sub>CH<sub>3</sub>). <sup>13</sup>C NMR (101 MHz, CDCl<sub>3</sub>) δ 156.01(CO), 137.95(2, Ar), 133.32(Ar), 133.17(Ar), 129.88(Ar), 129.79(Ar), 129.71(Ar), 128.44(Ar), 61.30(-CH-NH<sub>2</sub>), 59.62(-CH<sub>2</sub>CH<sub>3</sub>),

58.99(-CH-S-), 21.09(-CH<sub>3</sub>), 13.92(-CH<sub>2</sub>CH<sub>3</sub>). **HR-ESI-MS:** Calcd for C<sub>18</sub>H<sub>20</sub>ClNO<sub>2</sub>S [M+H]<sup>+</sup>: 350.0976, found: 350.0972; [M+Na]<sup>+</sup>:372.0796, found: 372.0801.  $[\alpha]_D^{20} = 140^\circ$  (c 0.5g/100mL in CH<sub>3</sub>OH).

**ethyl-(2S,3S)-2-amino-3-(4-methoxyphenylthiol)-3-(4-fluorophenyl)-propanoate (4c)**

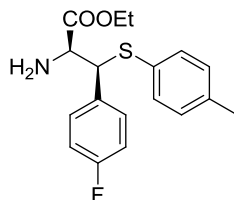

<sup>1</sup>H NMR (400 MHz, CDCl<sub>3</sub>) δ 7.32-7.28 (m, 2H, *H*-p-F-Ph), 7.15 (d, *J* = 8.0 Hz, 2H, *H*-p-CH<sub>3</sub>-Ph), 7.01 (d, *J* = 8.0 Hz, 2H, *H*-p-CH<sub>3</sub>-Ph), 6.98-6.93 (m, 2H, *H*-p-F-Ph), 4.44 (d, *J* = 6.0 Hz, 1H, -CH-NH<sub>2</sub>), 4.04-3.91 (m, 2H, -CH<sub>2</sub>CH<sub>3</sub>), 3.80 (d, *J* = 6.0 Hz, 1H, -CH-S-), 2.28 (s, 3H, -CH<sub>3</sub>), 1.07 (t, *J* = 8.0 Hz, 3H, -CH<sub>2</sub>CH<sub>3</sub>). <sup>13</sup>C NMR (101 MHz, CDCl<sub>3</sub>) δ 163.32(CO), 137.88(Ar), 135.43(Ar), 133.20(Ar), 130.08(Ar), 130.00(Ar), 129.67(Ar), 115.25(Ar), 115.03(Ar), 61.22(-CH-NH<sub>2</sub>), 59.84(-CH<sub>2</sub>CH<sub>3</sub>), 58.94(-CH-S-), 21.08(-CH<sub>3</sub>), 13.91(-CH<sub>2</sub>CH<sub>3</sub>). **HR-ESI-MS:** Calcd for C<sub>18</sub>H<sub>20</sub>FNO<sub>2</sub>S [M+H]<sup>+</sup>: 334.1277, found: 334.1272.  $[\alpha]_D^{20} = 130^\circ$  (c 0.5g/100mL in CH<sub>3</sub>OH).



# Copies of NMR spectra of 3 and 4

## 3a

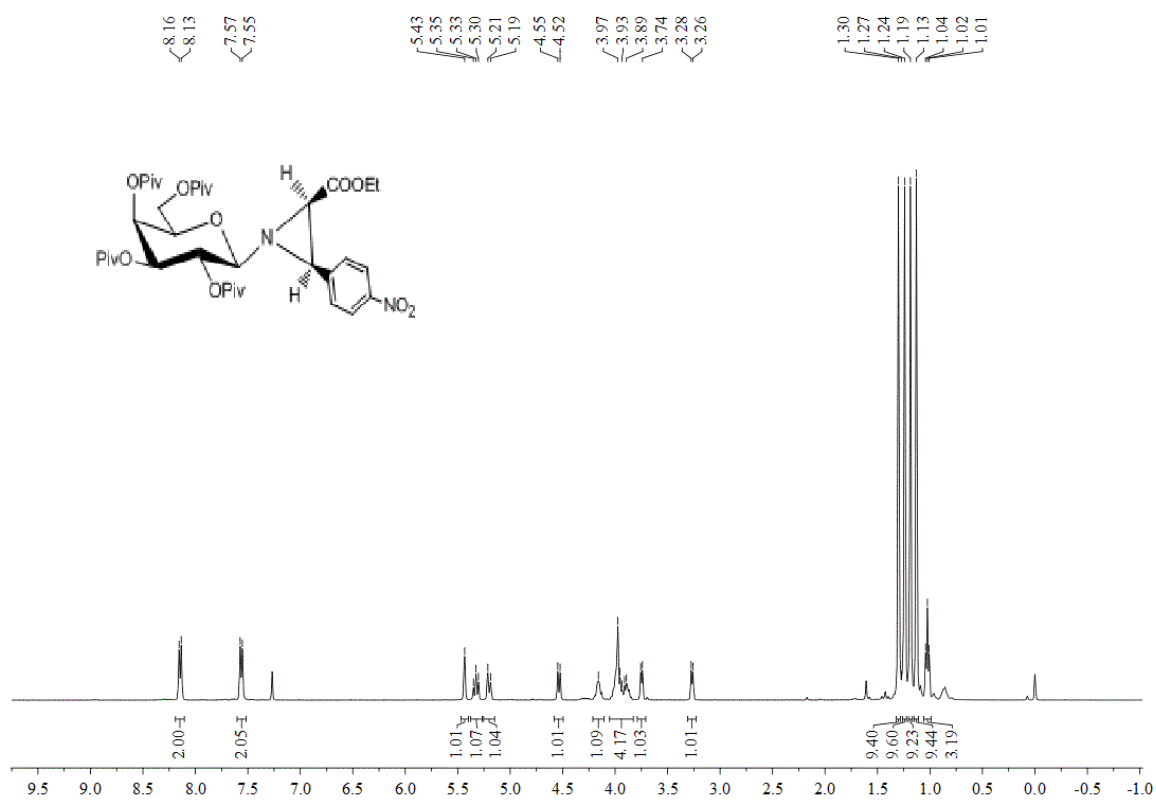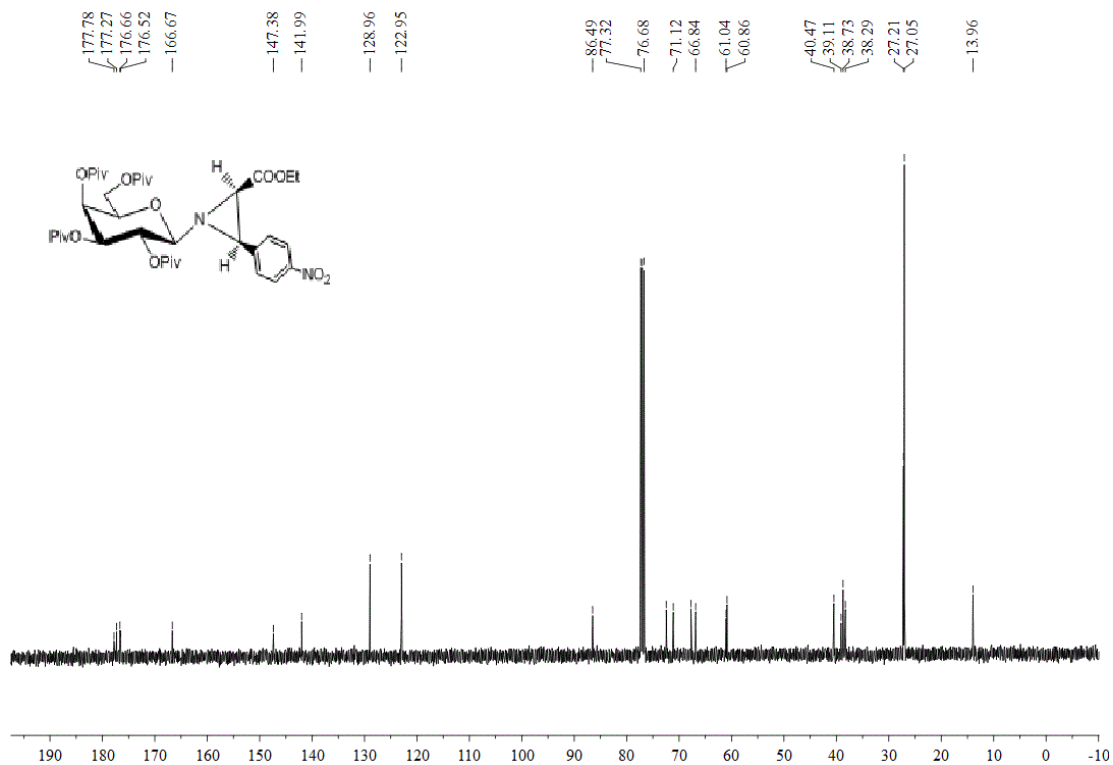

3b

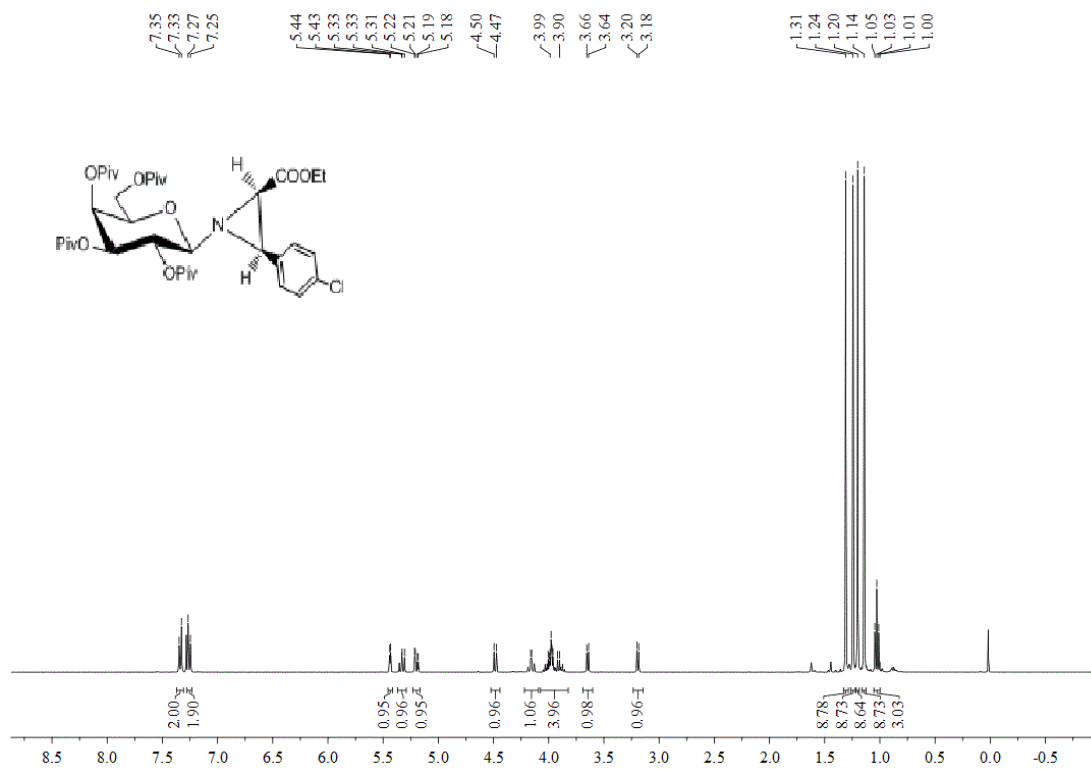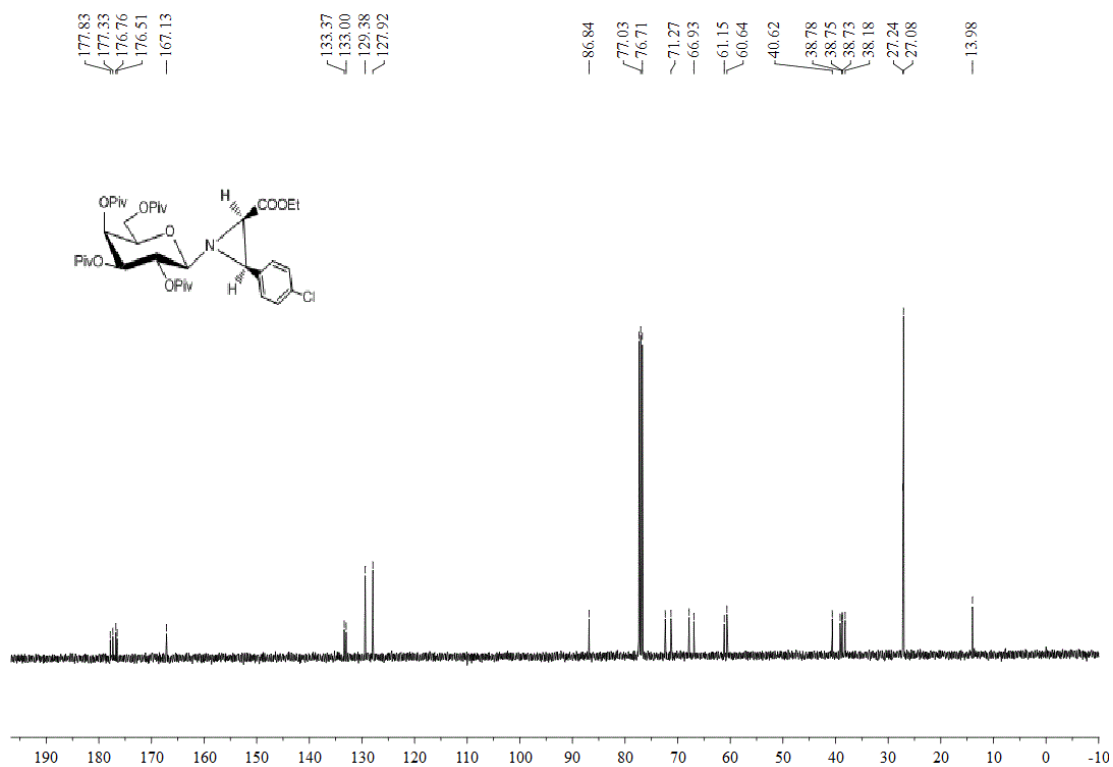

3c

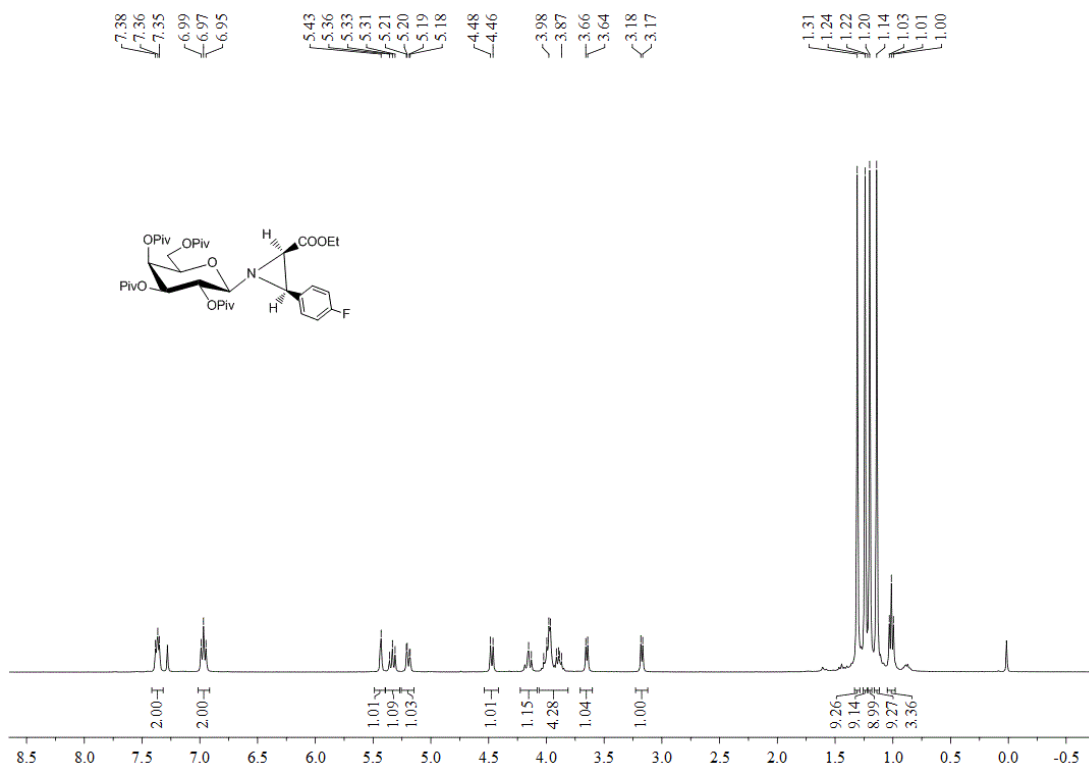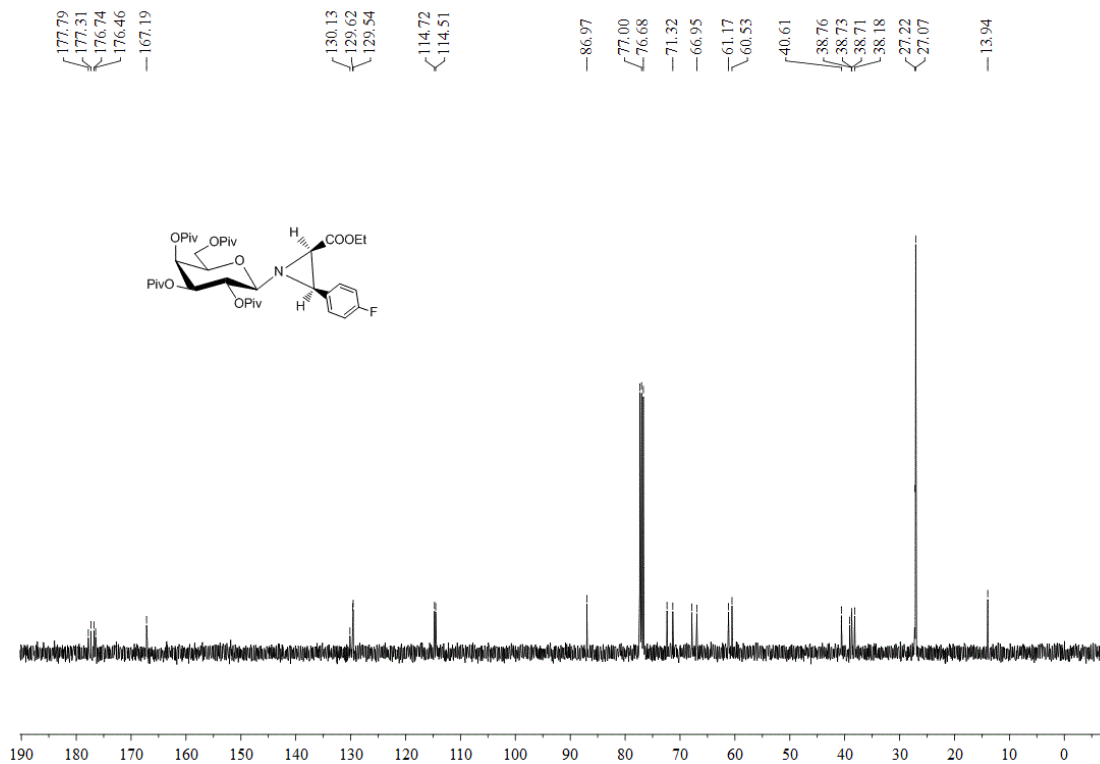

3d

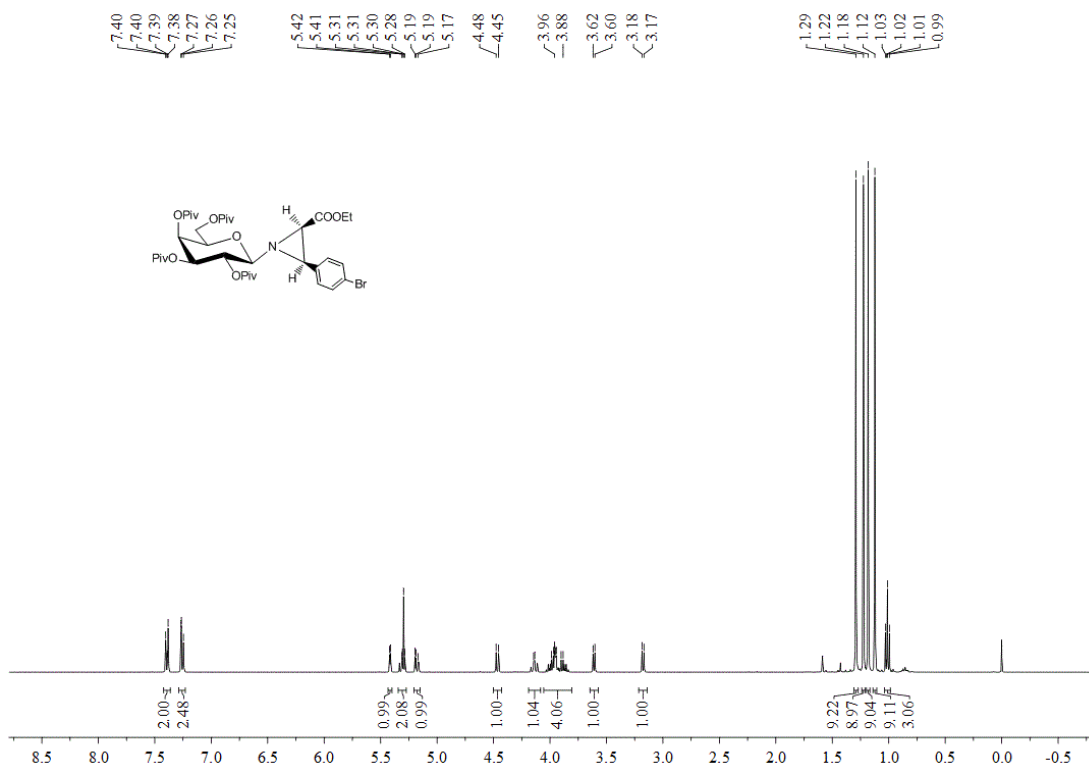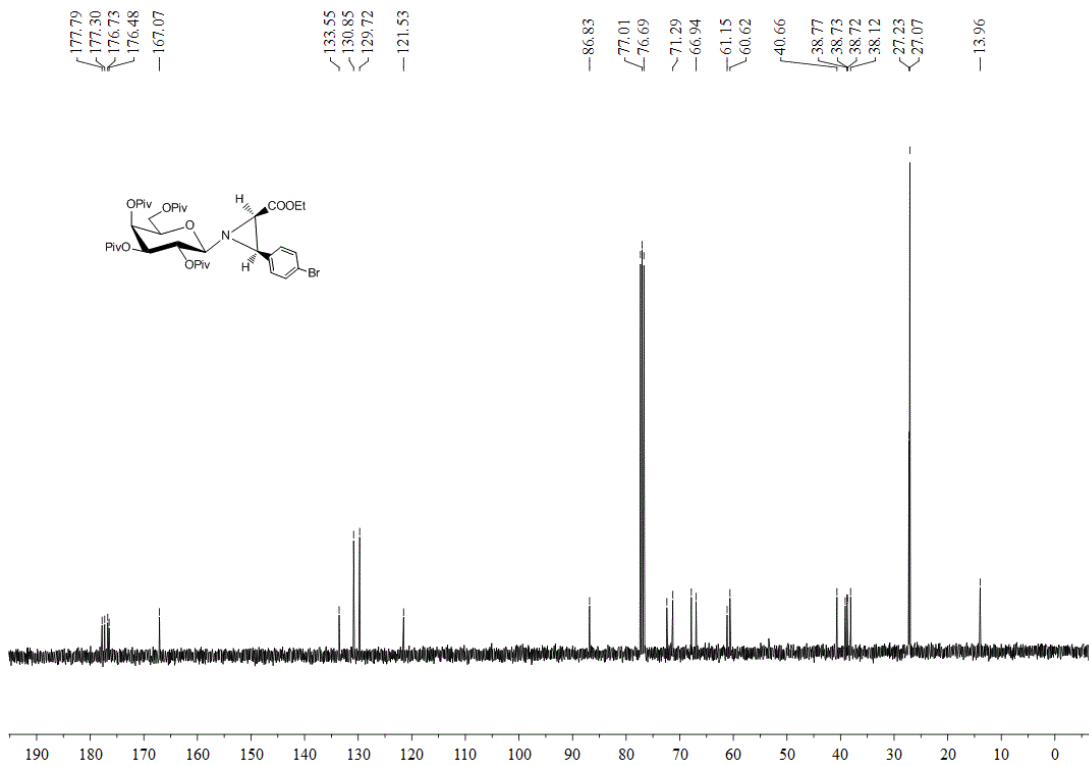

3e

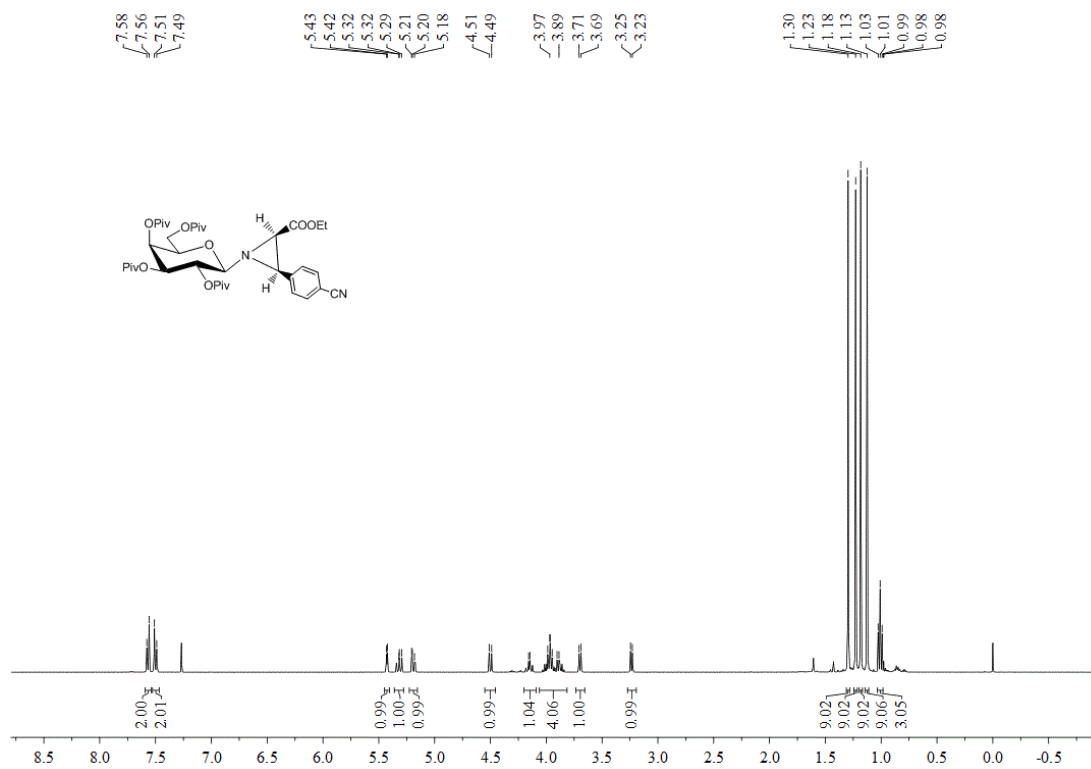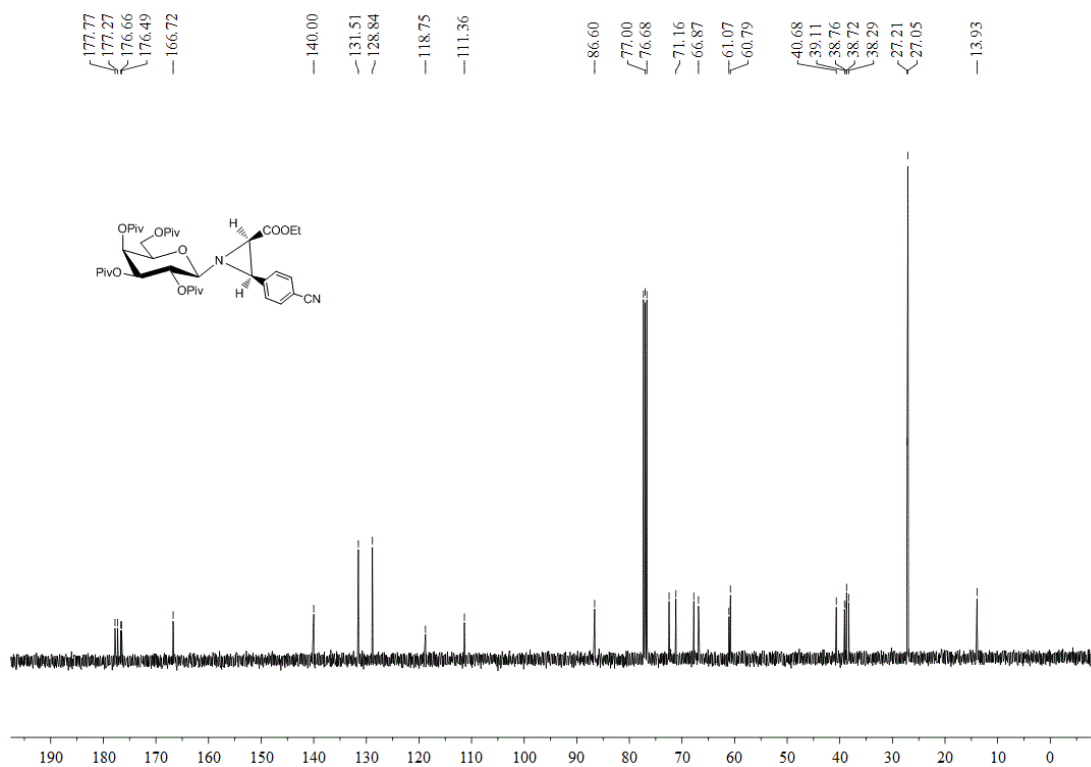

3f

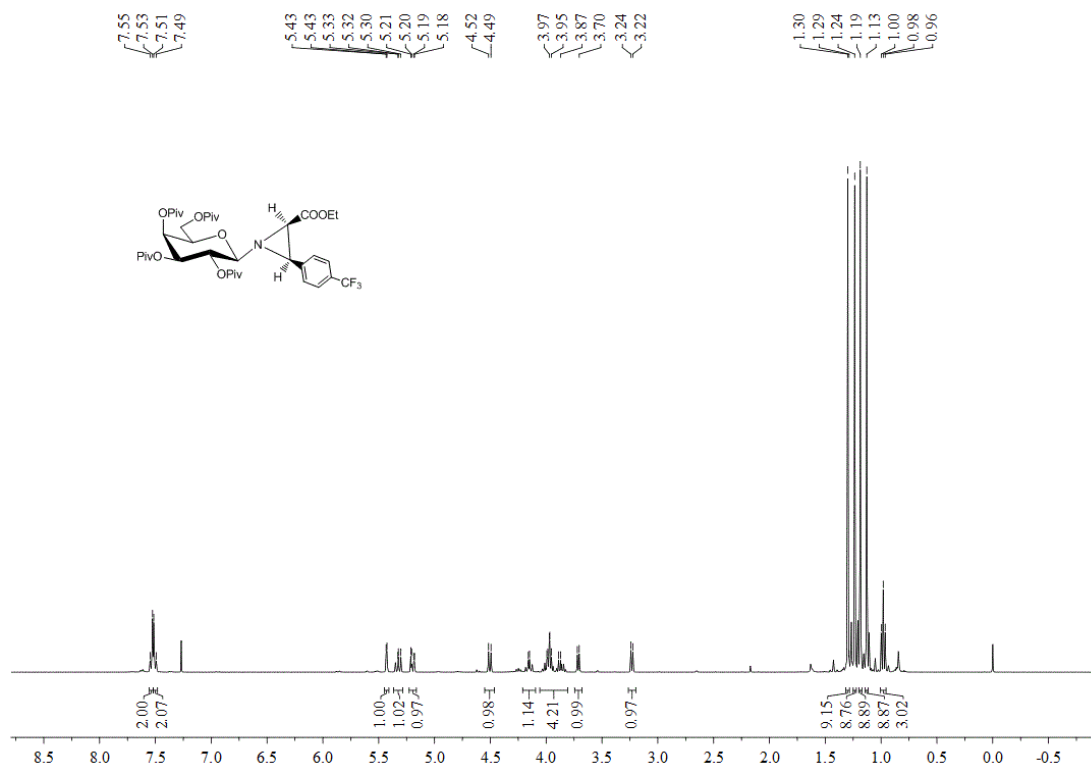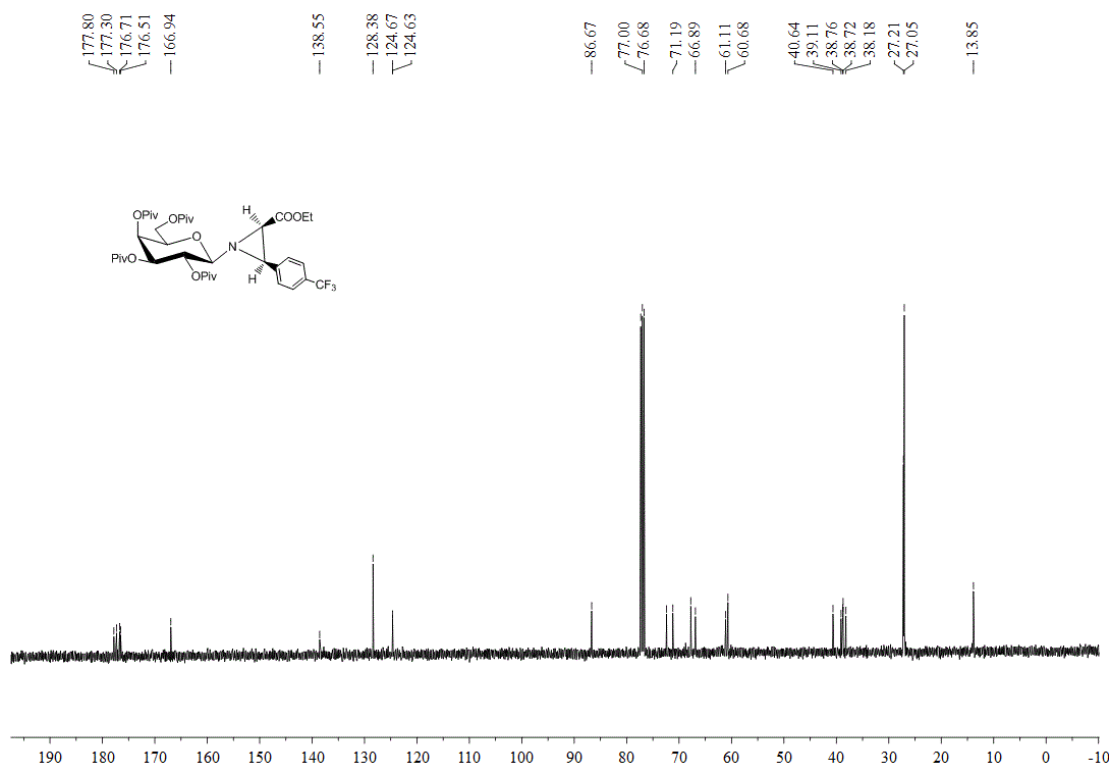

3j

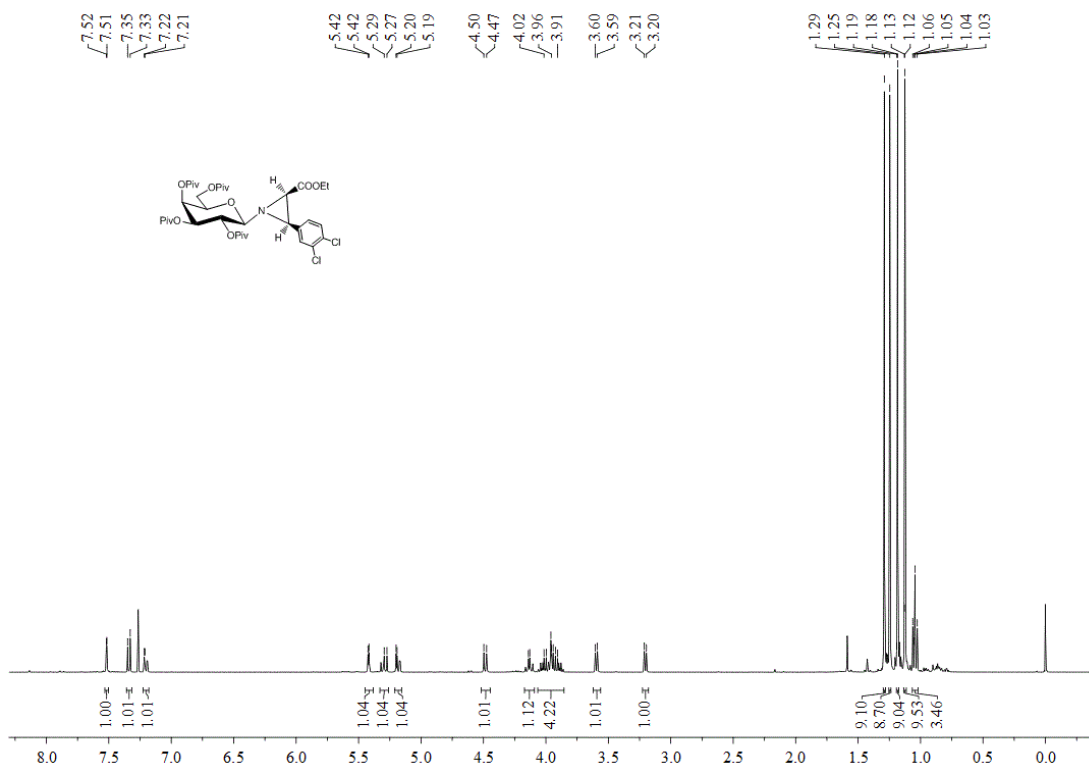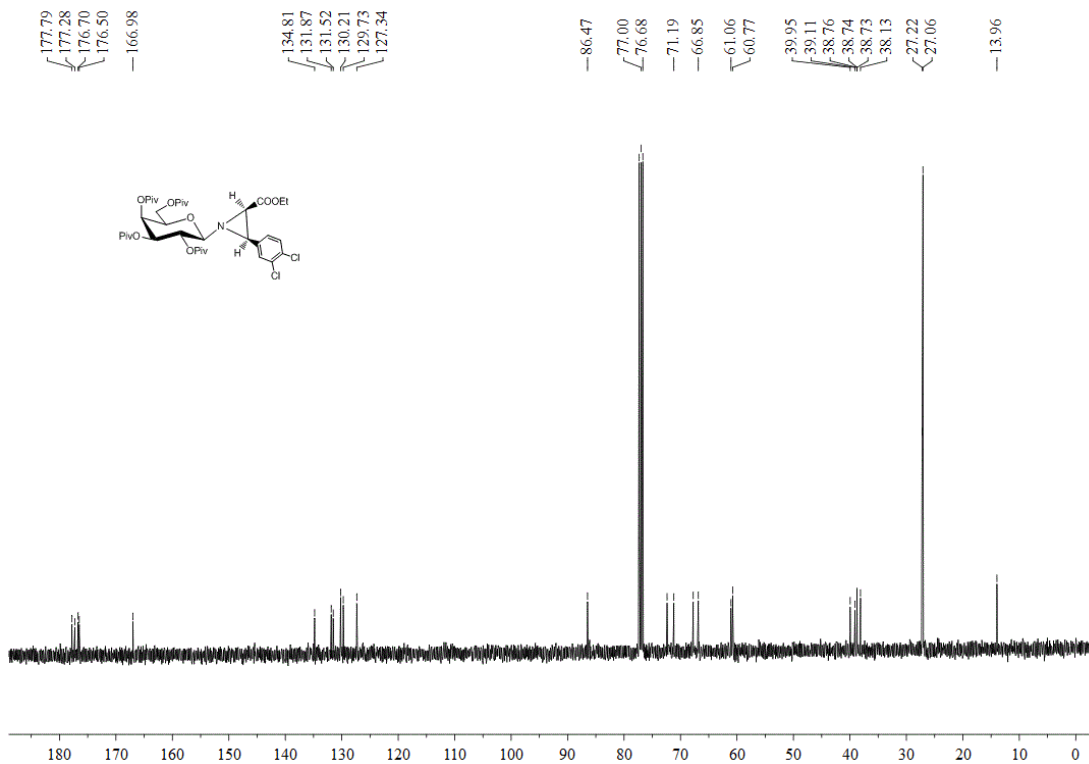

# 3k

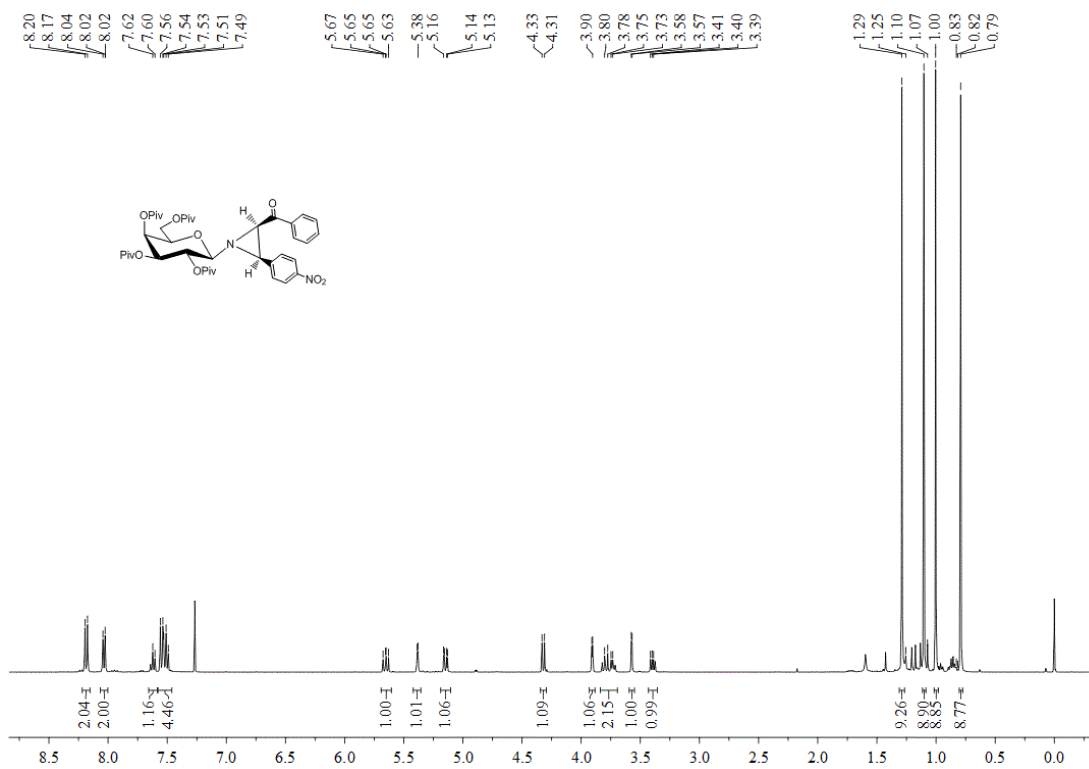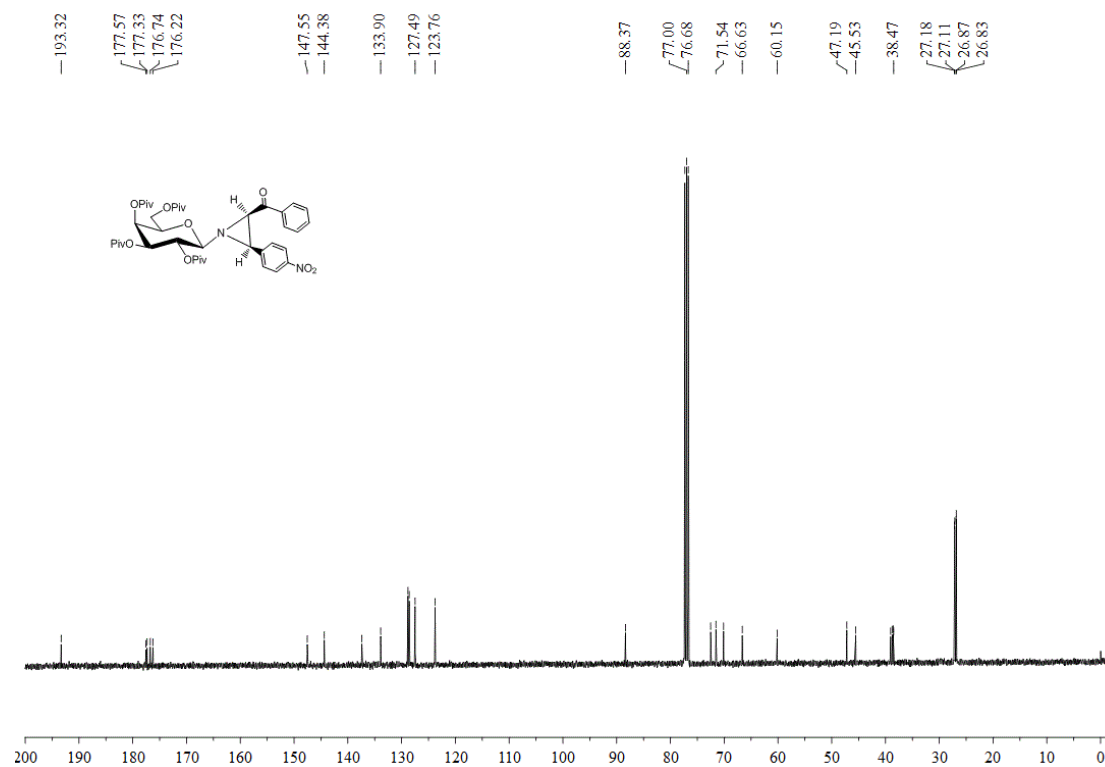



4a:

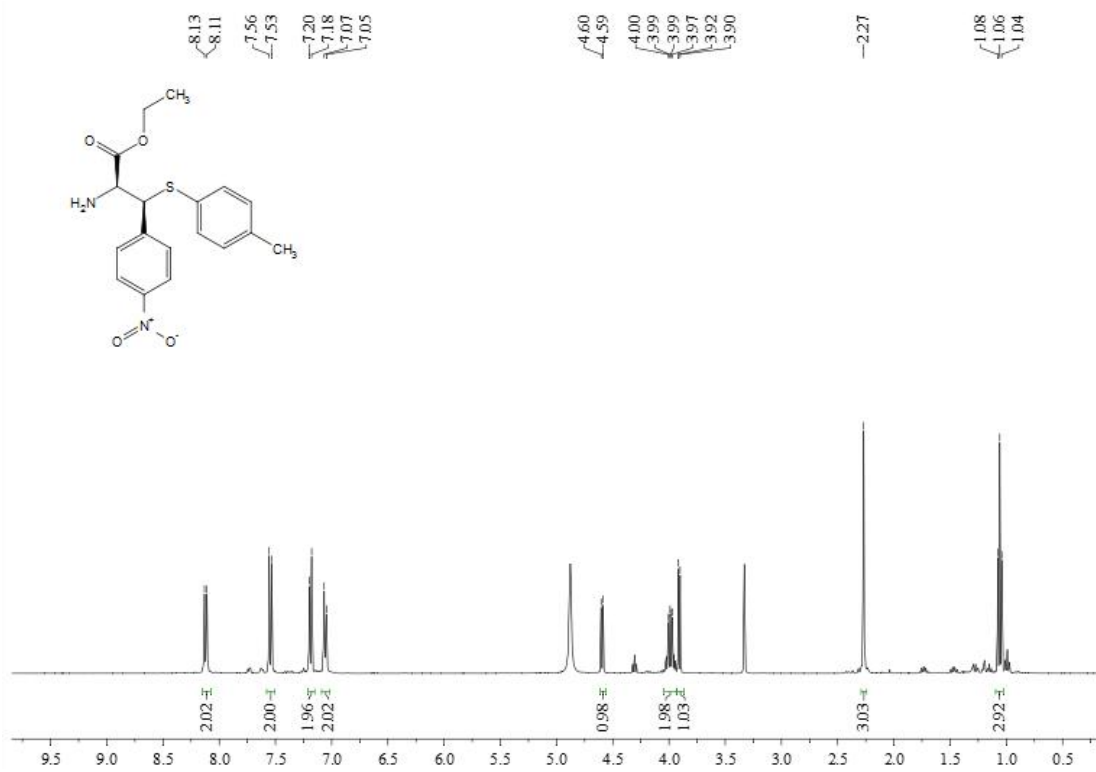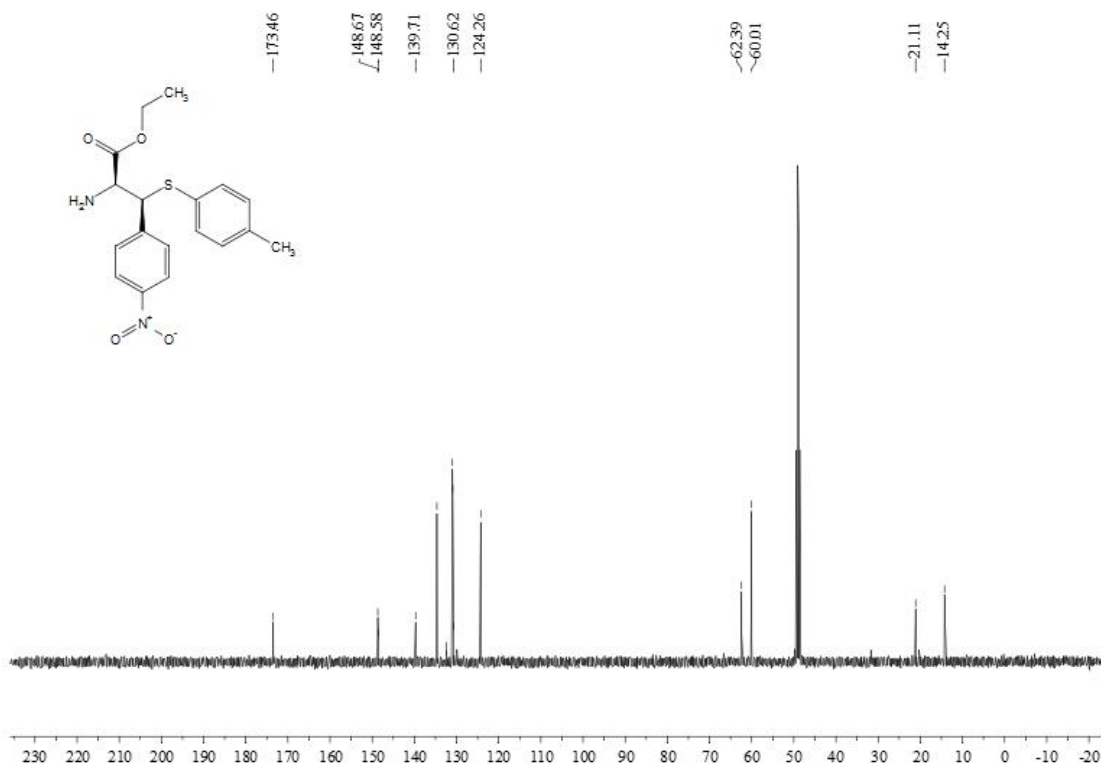

4b:

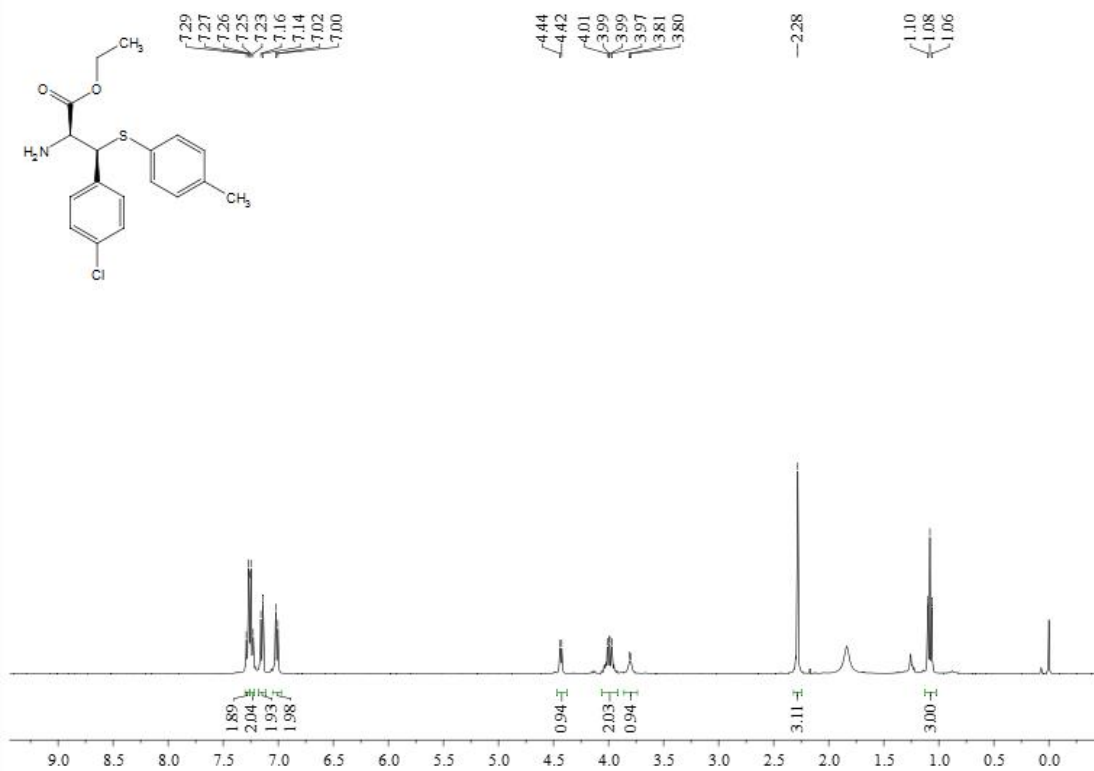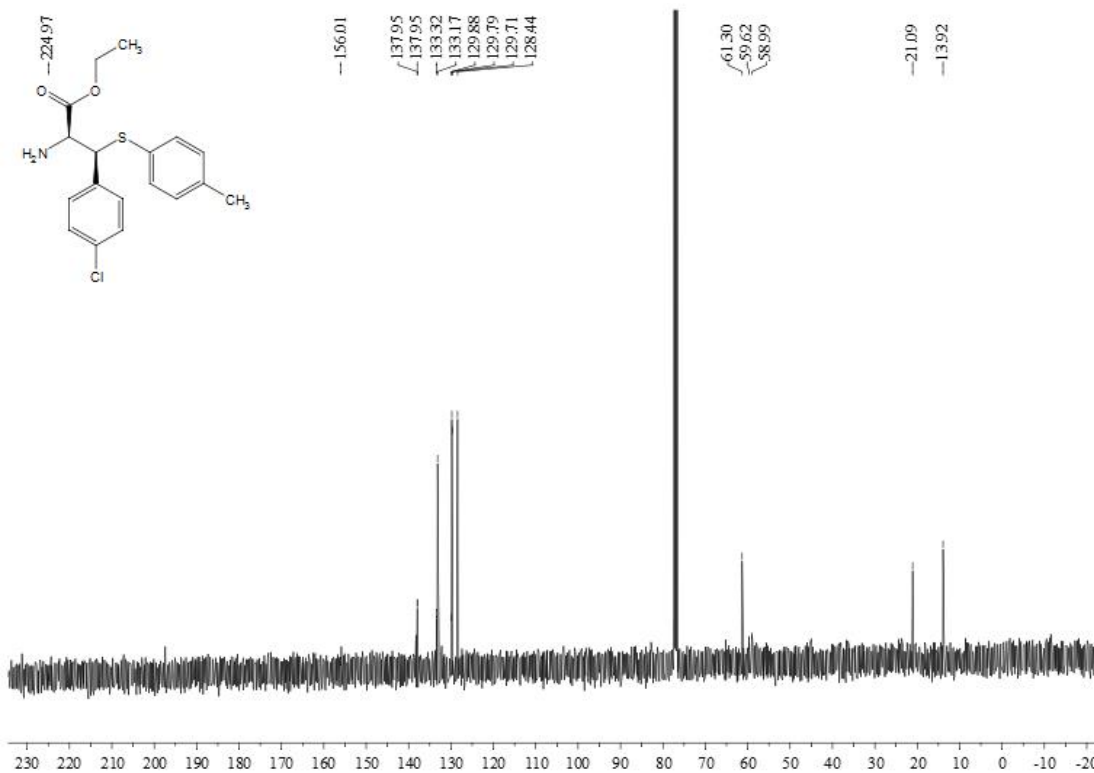

4c:

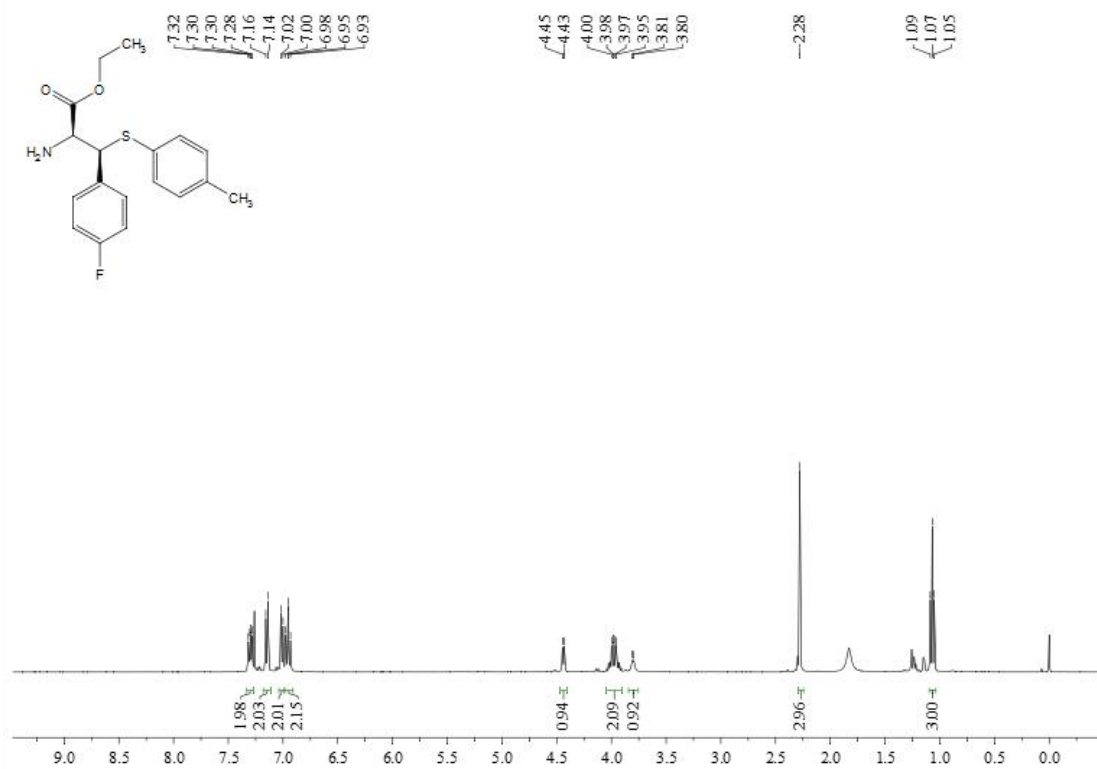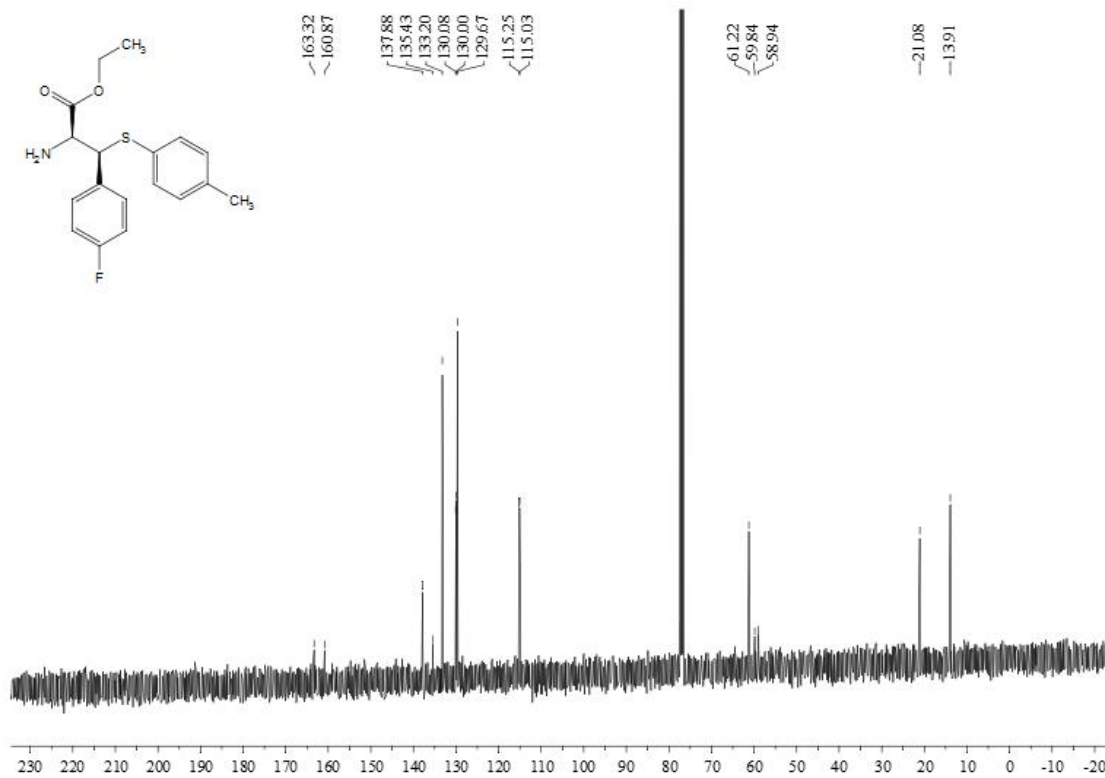

# Copies of HR-ESI-MS spectra of 3 and 4

3a:

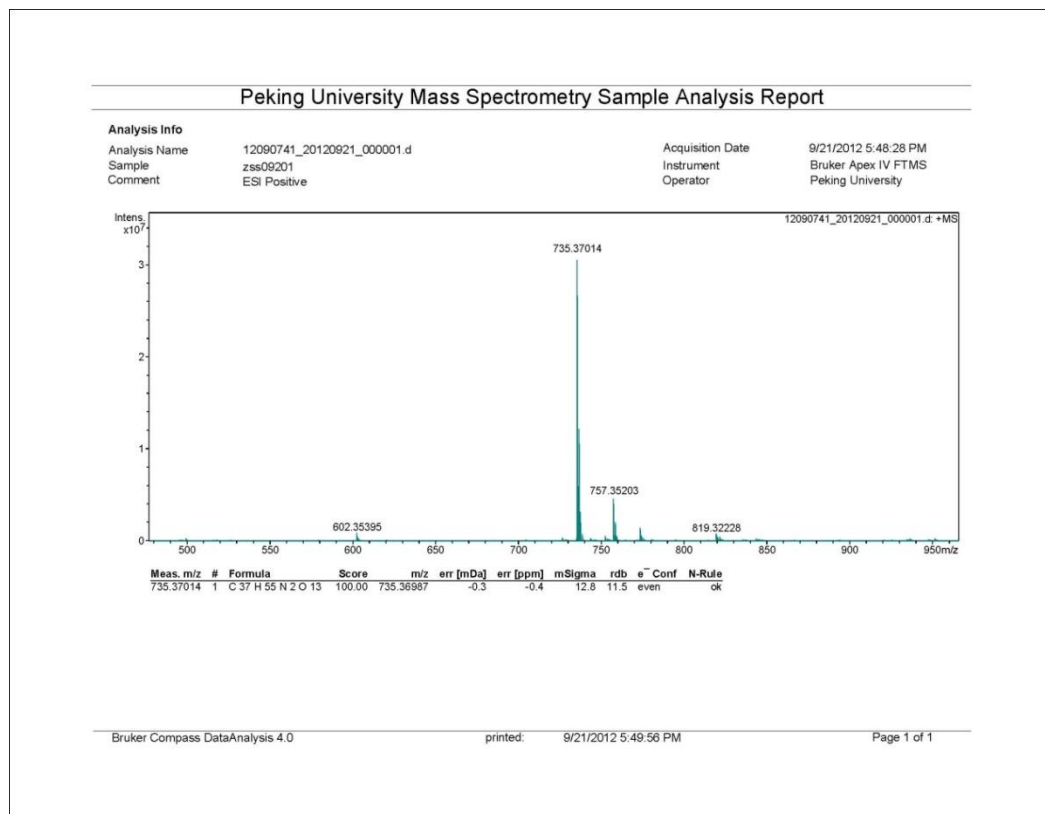

3b:

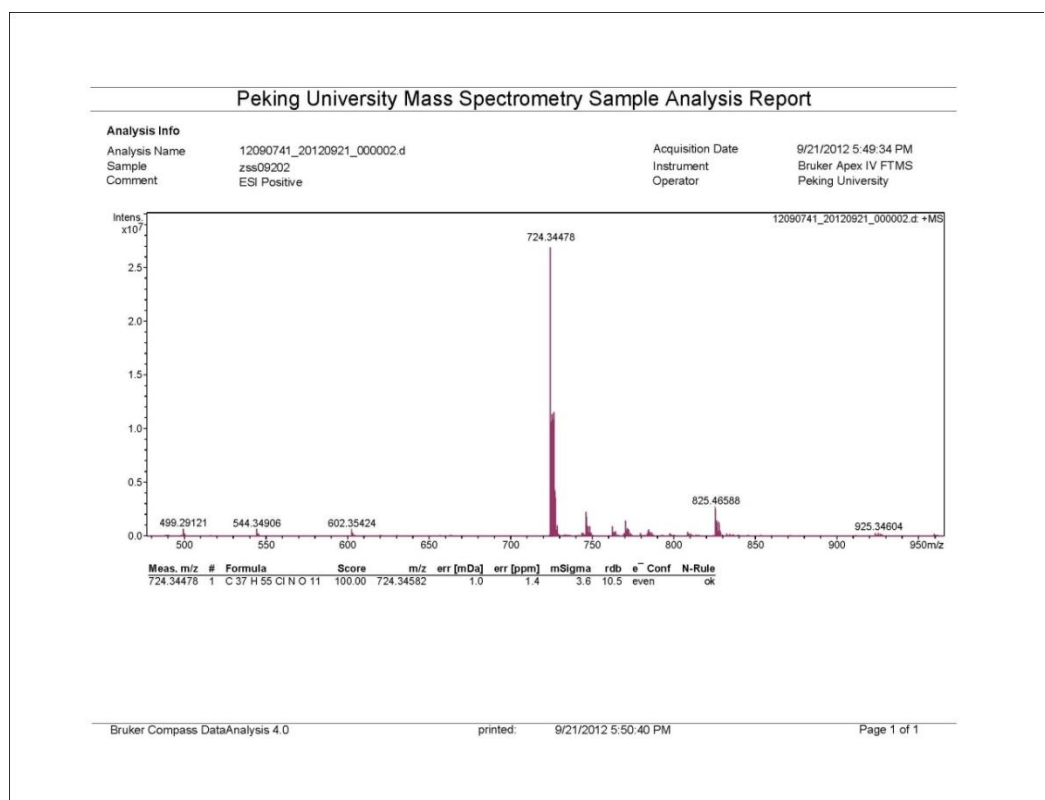

3c:

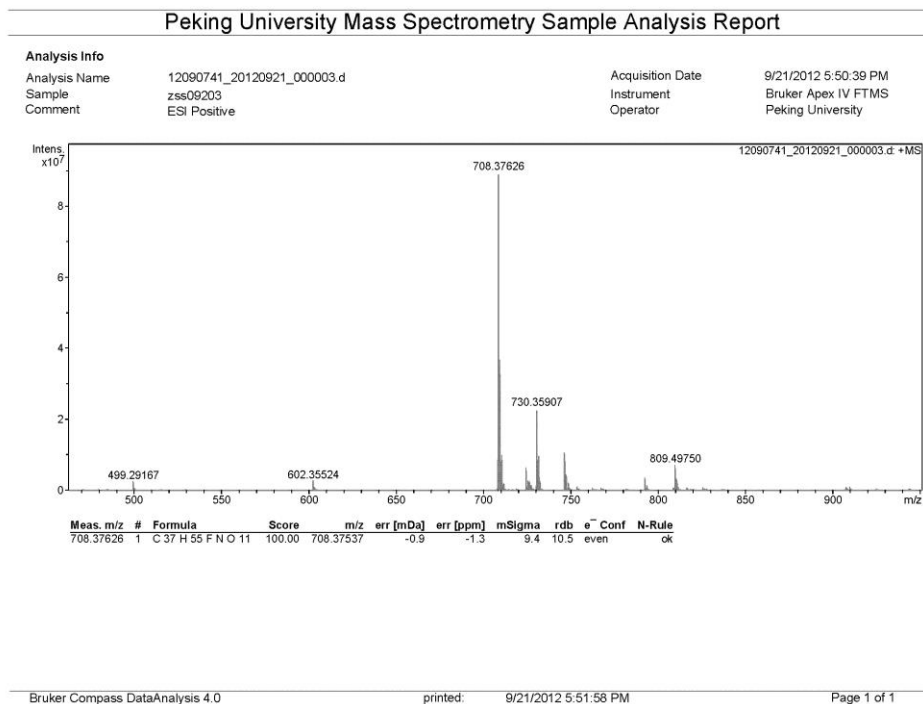

3d:

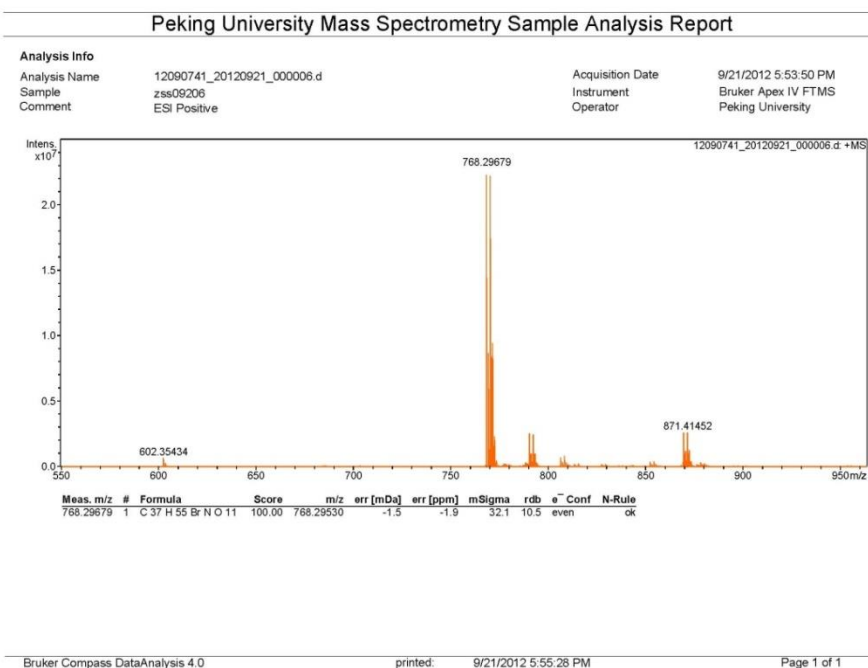

3e:

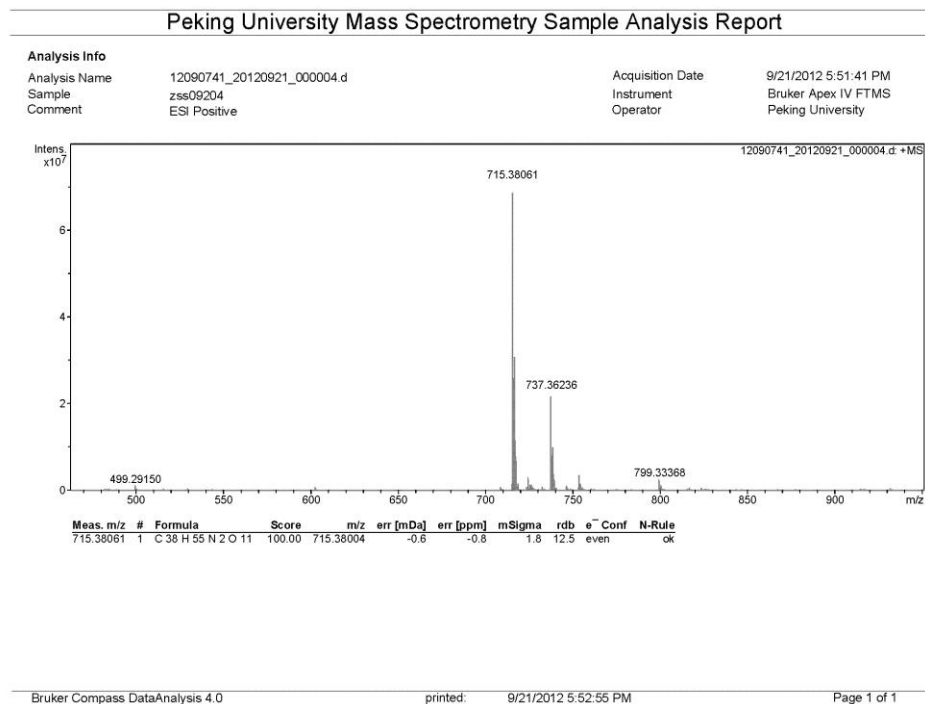

3f:

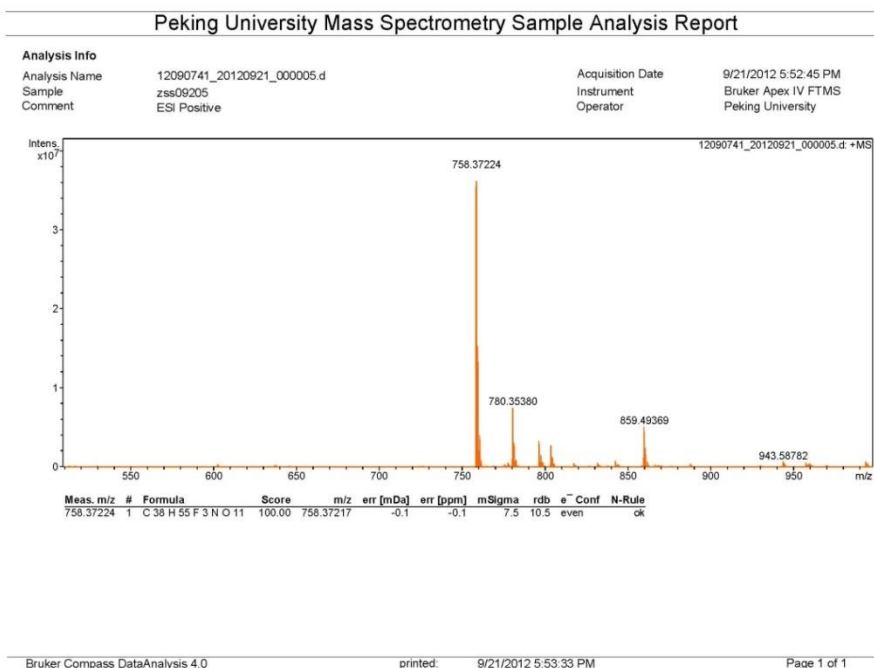

3j:

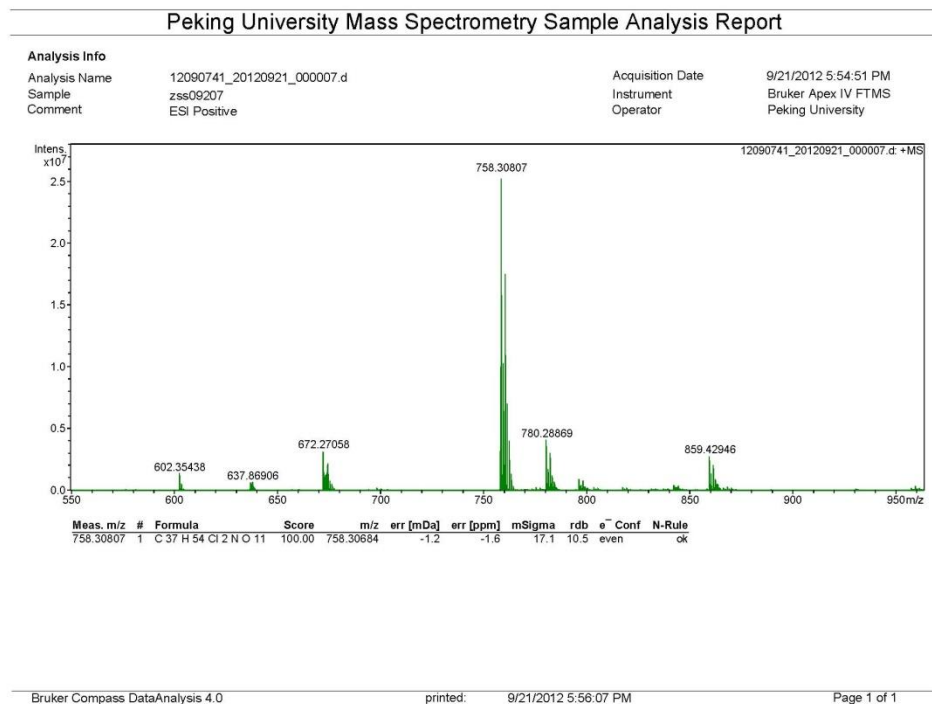

3k:

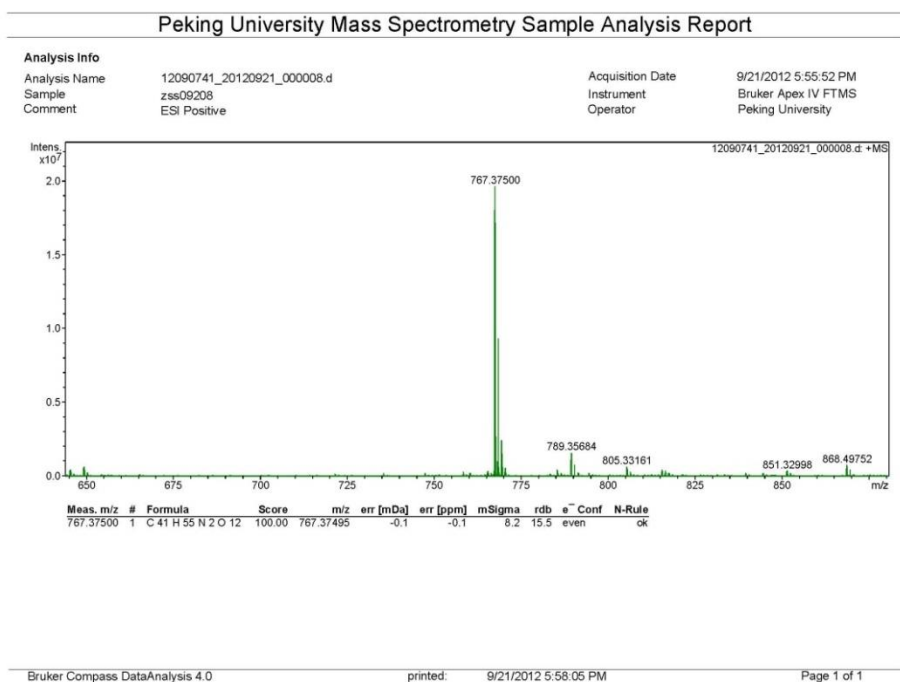

4a:

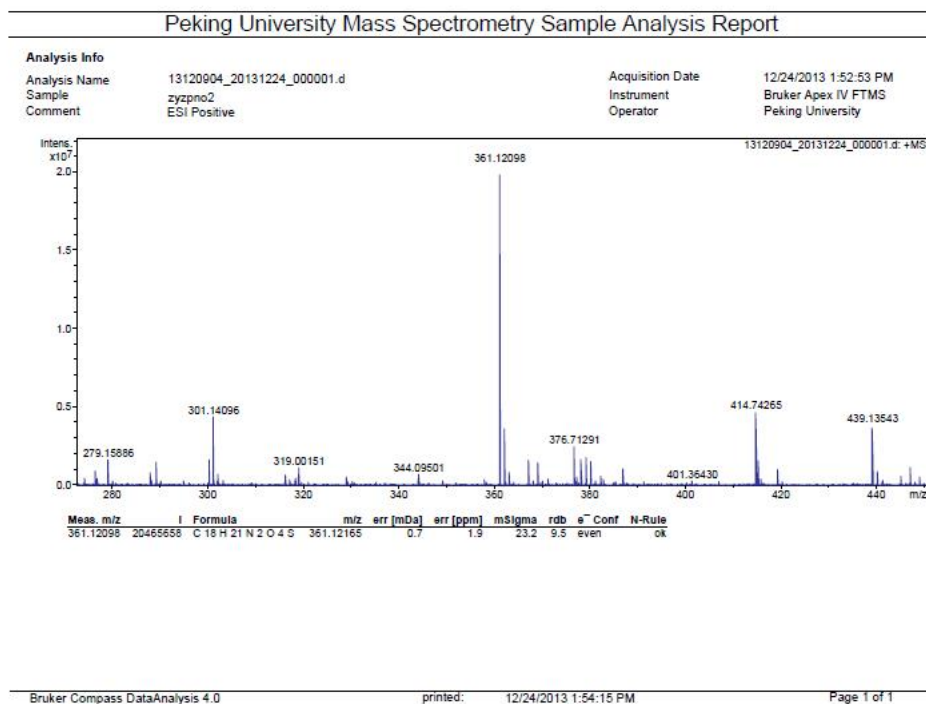

4b:

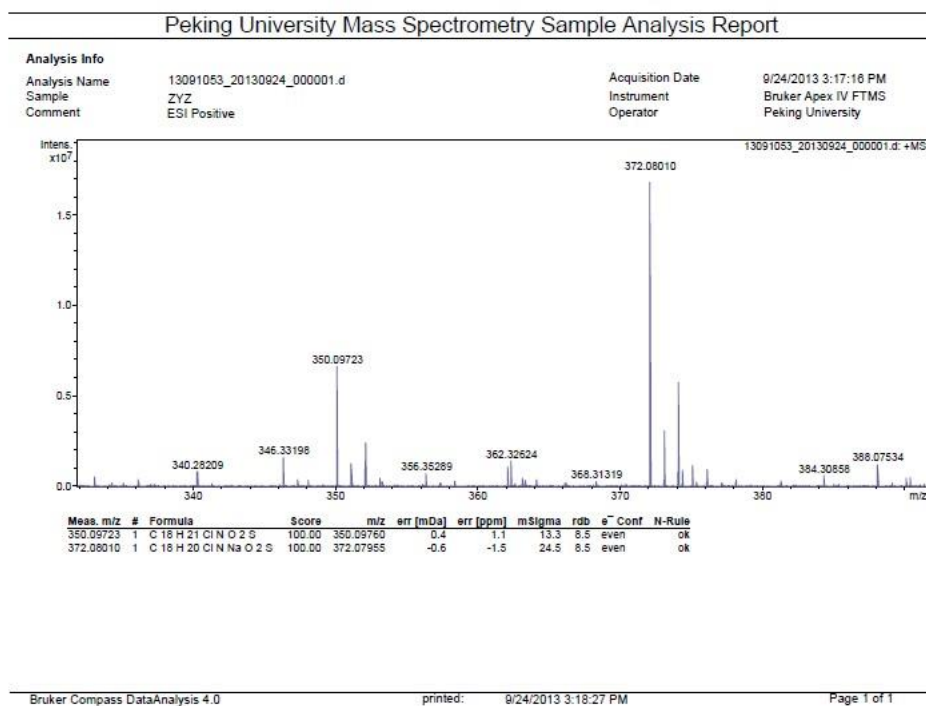



4c:

Peking University Mass Spectrometry Sample Analysis Report

Analysis Info

Analysis Name 13090880\_20130918\_000004.d  
Sample zyz2  
Comment ESI Positive

Acquisition Date 9/18/2013 5:01:13 PM  
Instrument Bruker Apex IV FTMS  
Operator Peking University

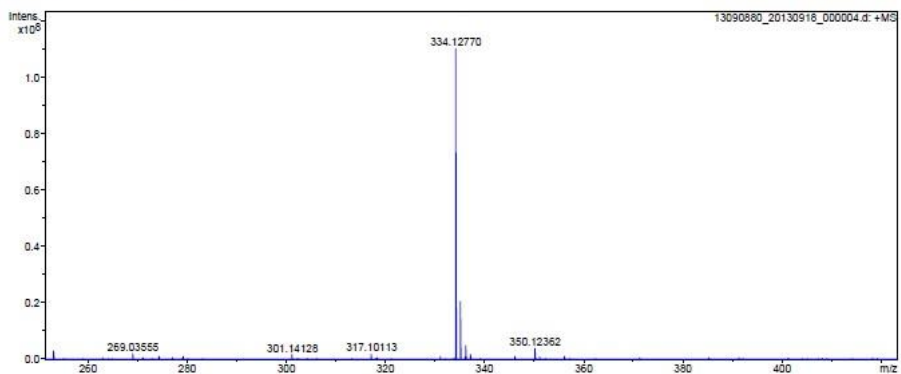

| Meas. m/z | # | Formula                                                                        | Score  | m/z       | err (mDa) | err (ppm) | mSigma | rdb | e <sup>-</sup> | Conf | N-Rule |
|-----------|---|--------------------------------------------------------------------------------|--------|-----------|-----------|-----------|--------|-----|----------------|------|--------|
| 334.12770 | 1 | C <sub>18</sub> H <sub>21</sub> F <sub>3</sub> N <sub>2</sub> O <sub>2</sub> S | 100.00 | 334.12716 | -0.5      | -1.6      | 15.9   | 8.5 | even           | ok   |        |

## Copies of chiral HPLC data of 3 and 4

3a:

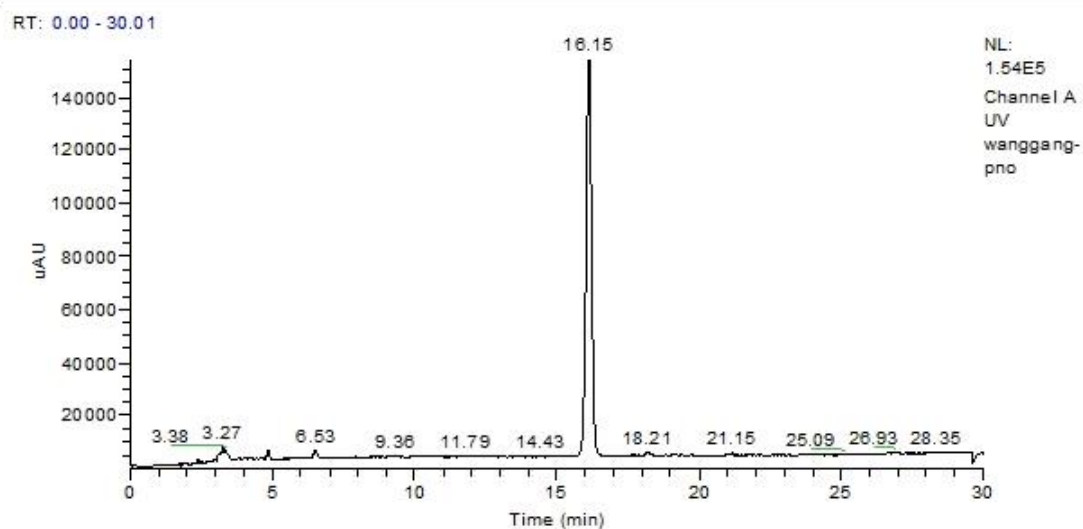

3b:

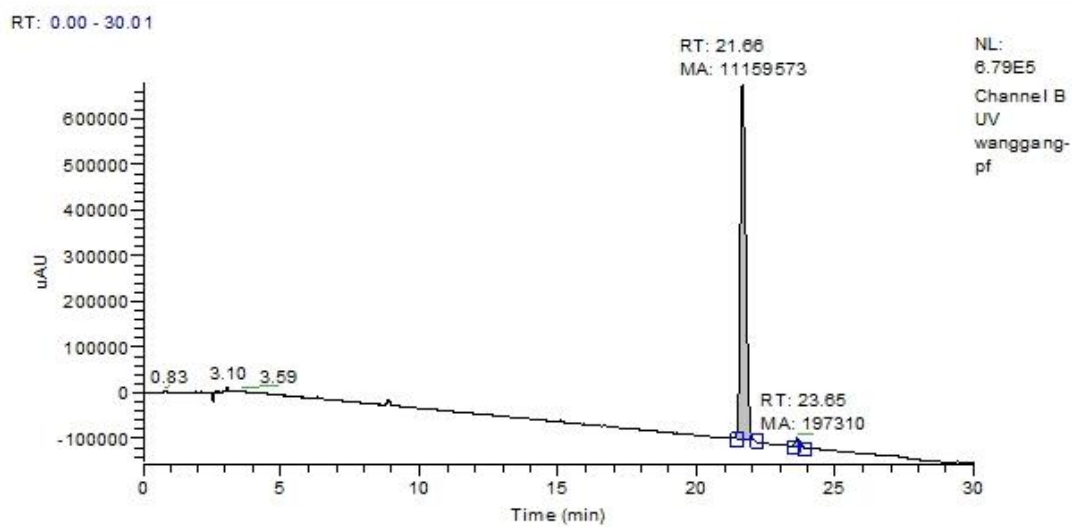

3c:

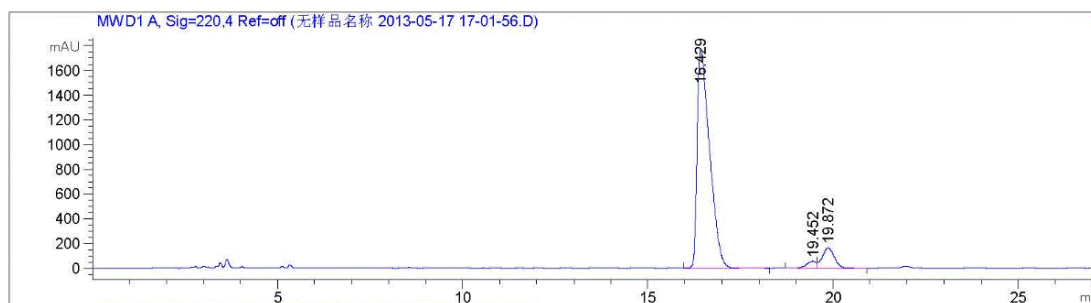

信号 1: MWD1 A, Sig=220,4 Ref=off

| 峰 # | 保留时间 [min] | 类型 | 峰宽 [min] | 峰面积 [mAU*s] | 峰高 [mAU]   | 峰面积 %   |
|-----|------------|----|----------|-------------|------------|---------|
| 1   | 16.429     | VB | 0.3511   | 4.12330e4   | 1774.35815 | 89.5958 |
| 2   | 19.452     | BV | 0.2846   | 1069.91467  | 56.07209   | 2.3248  |
| 3   | 19.872     | VB | 0.3428   | 3718.21240  | 165.05069  | 8.0794  |

总量 : 4.60211e4 1995.48093

3d:

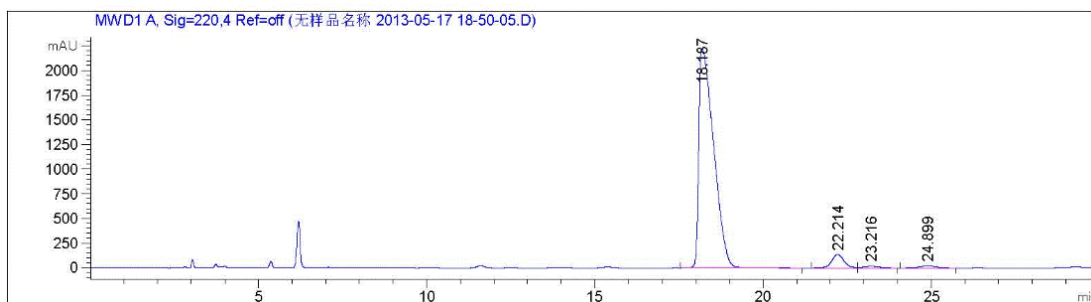

信号 1: MWD1 A, Sig=220,4 Ref=off

| 峰 # | 保留时间 [min] | 类型 | 峰宽 [min] | 峰面积 [mAU*s] | 峰高 [mAU]   | 峰面积 %   |
|-----|------------|----|----------|-------------|------------|---------|
| 1   | 18.187     | BB | 0.4762   | 6.79308e4   | 2225.08398 | 94.0606 |
| 2   | 22.214     | BV | 0.3758   | 3267.39575  | 134.34055  | 4.5242  |
| 3   | 23.216     | VB | 0.3876   | 419.78641   | 16.68236   | 0.5813  |
| 4   | 24.899     | BB | 0.4090   | 602.27289   | 22.73775   | 0.8339  |

总量 : 7.22203e4 2398.84464

3e:

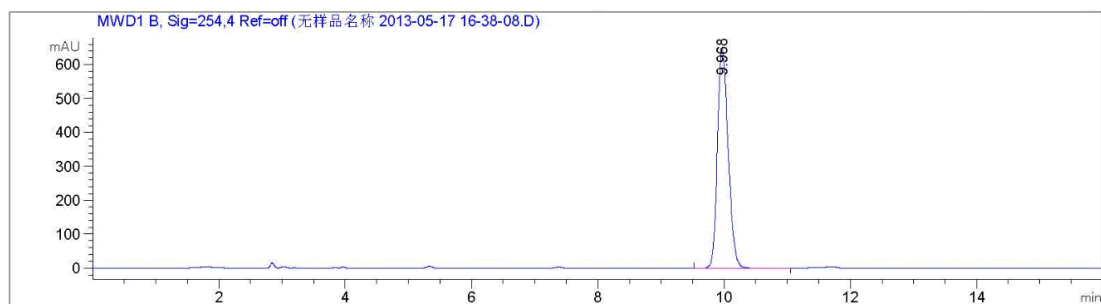

信号 2: MWD1 B, Sig=254,4 Ref=off

| 峰 # | 保留时间 [min] | 类型 | 峰宽 [min] | 峰面积 [mAU*s] | 峰高 [mAU]  | 峰面积 %    |
|-----|------------|----|----------|-------------|-----------|----------|
| 1   | 9.968      | BB | 0.1841   | 7641.28223  | 645.74554 | 100.0000 |

总量 : 7641.28223 645.74554

3f:

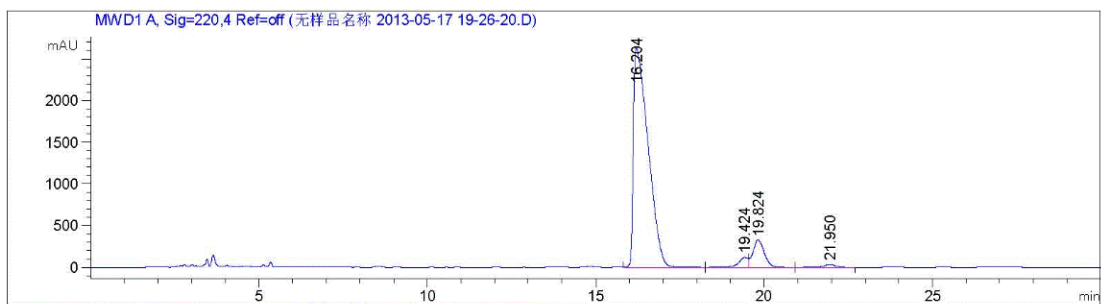

信号 1: MWD1 A, Sig=220,4 Ref=off

| 峰 # | 保留时间 [min] | 类型 | 峰宽 [min] | 峰面积 [mAU*s] | 峰高 [mAU]   | 峰面积 %   |
|-----|------------|----|----------|-------------|------------|---------|
| 1   | 16.204     | VB | 0.4205   | 7.94137e4   | 2628.37769 | 88.3491 |
| 2   | 19.424     | BV | 0.2770   | 2203.21704  | 117.37755  | 2.4511  |
| 3   | 19.824     | VB | 0.3533   | 7554.48926  | 324.88876  | 8.4045  |
| 4   | 21.950     | BB | 0.3824   | 714.80963   | 28.71903   | 0.7952  |

总量 : 8.98862e4 3099.36302

3j:

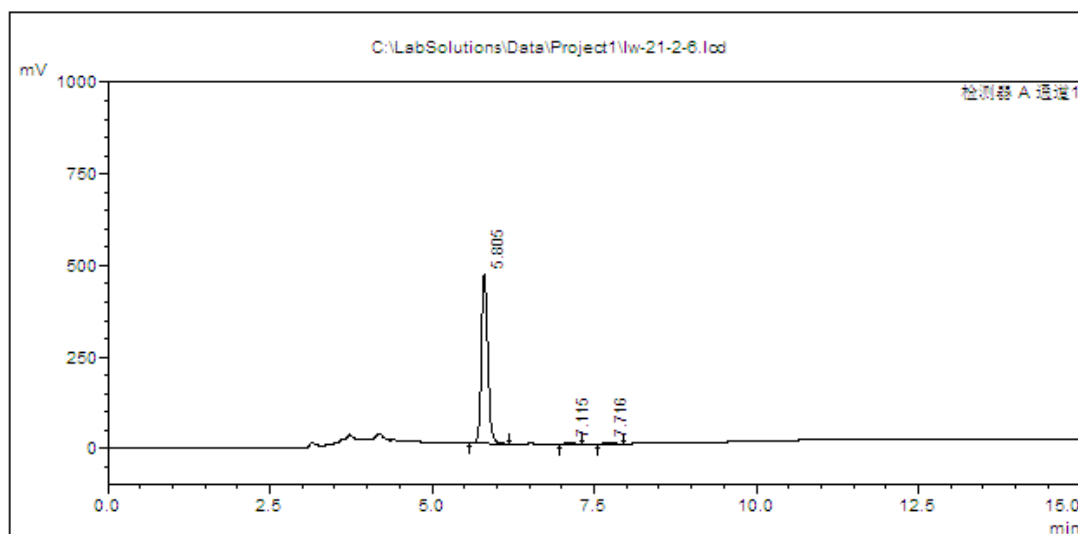

峰表

检测器 A Ch1 220nm

| 峰# | 保留时间  | 面积      | 高度     | 面积 %    | 高度 %    |
|----|-------|---------|--------|---------|---------|
| 1  | 5.805 | 3128591 | 463283 | 98.380  | 98.698  |
| 2  | 7.115 | 24473   | 2978   | 0.770   | 0.634   |
| 3  | 7.716 | 27058   | 3133   | 0.851   | 0.667   |
| 总计 |       | 3180122 | 469393 | 100.000 | 100.000 |

3k:

RT: 0.00 - 30.01

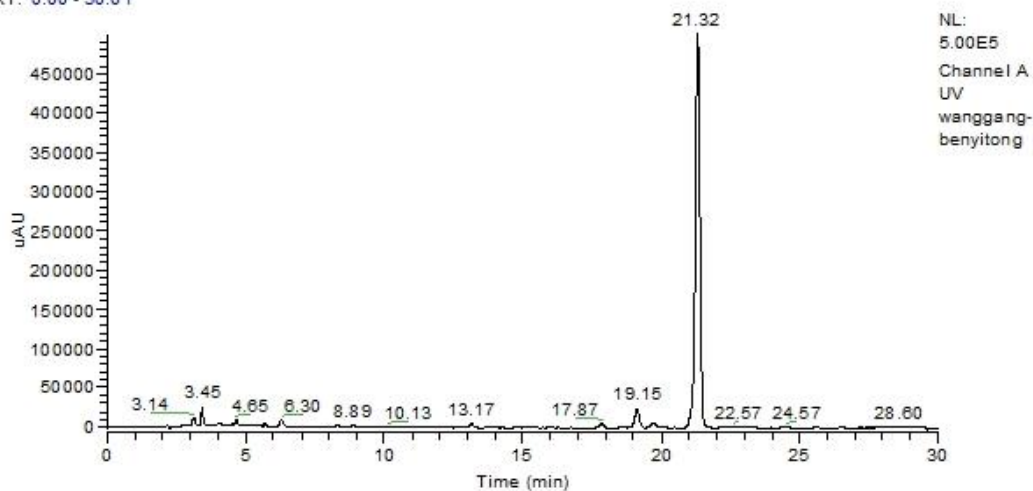

4a:

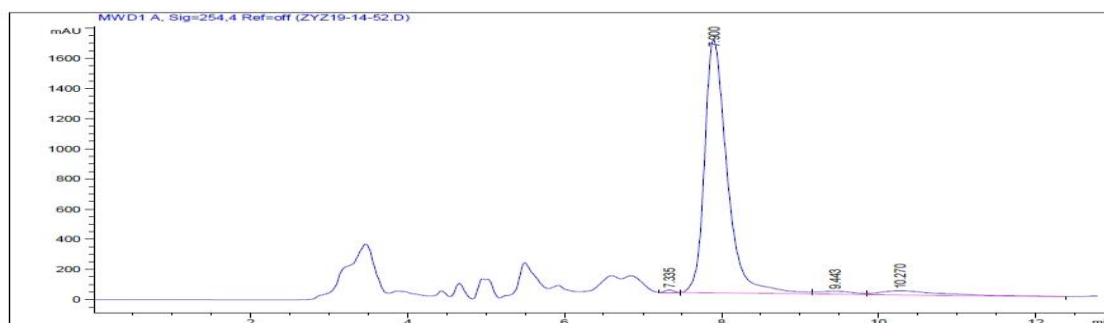

信号 1: MWD1 A, Sig=254,4 Ref=off

| 峰 # | 保留时间 [min] | 类型 | 峰宽 [min] | 峰面积 [mAU*s] | 峰高 [mAU]   | 峰面积 %   |
|-----|------------|----|----------|-------------|------------|---------|
| 1   | 7.335      | BB | 0.1237   | 124.83826   | 16.60329   | 0.3497  |
| 2   | 7.900      | BV | 0.3005   | 3.34783e4   | 1679.68140 | 93.7897 |
| 3   | 9.443      | VV | 0.4392   | 605.48401   | 20.00107   | 1.6963  |
| 4   | 10.270     | VB | 0.7278   | 1486.44800  | 28.07254   | 4.1643  |

总量 : 3.56950e4 1744.35830

4b:

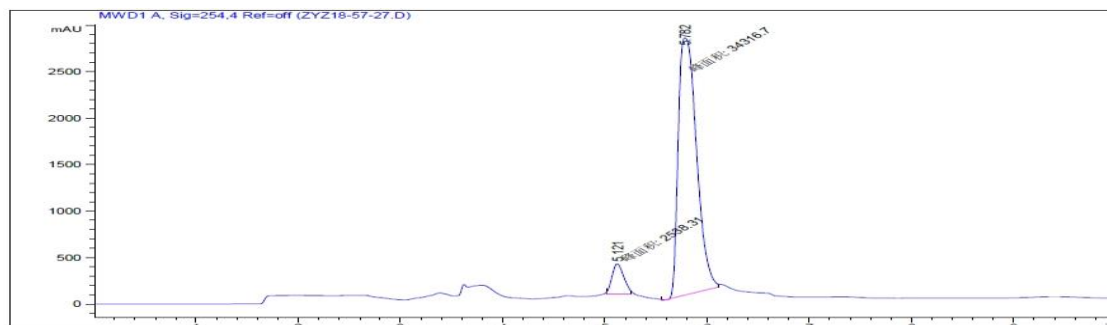

信号 1: MWD1 A, Sig=254,4 Ref=off

| 峰 # | 保留时间 [min] | 类型 | 峰宽 [min] | 峰面积 [mAU*s] | 峰高 [mAU]   | 峰面积 %   |
|-----|------------|----|----------|-------------|------------|---------|
| 1   | 5.121      | MM | 0.1304   | 2538.30786  | 324.31229  | 6.8873  |
| 2   | 5.782      | MM | 0.2066   | 3.43167e4   | 2767.93555 | 93.1127 |

总量 : 3.68550e4 3092.24783

4c:

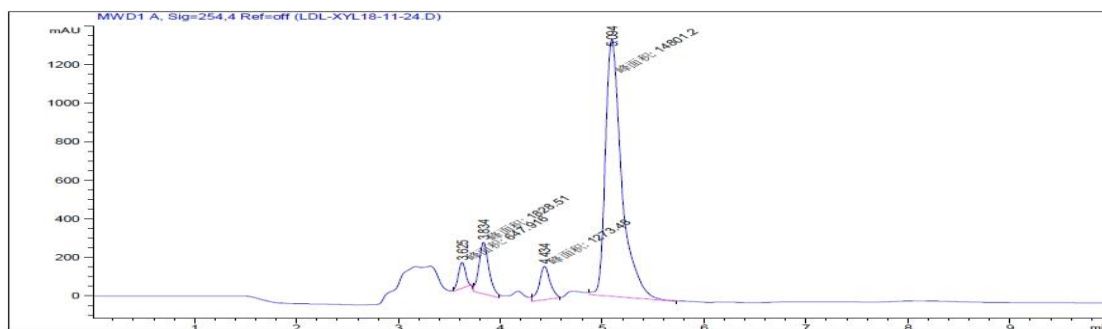

信号 1: MWD1 A, Sig=254,4 Ref=off

| 峰 # | 保留时间 [min] | 类型 | 峰宽 [min] | 峰面积 [mAU*s] | 峰高 [mAU]   | 峰面积 %   |
|-----|------------|----|----------|-------------|------------|---------|
| 1   | 3.625      | MM | 0.0806   | 647.91589   | 133.94518  | 3.4926  |
| 2   | 3.834      | MM | 0.1140   | 1828.50806  | 267.26379  | 9.8566  |
| 3   | 4.434      | MM | 0.1221   | 1273.48450  | 173.87038  | 6.8647  |
| 4   | 5.094      | MM | 0.1849   | 1.48012e4   | 1334.19653 | 79.7861 |

总量 : 1.85511e4 1909.27588
